# Supplementary material for: Post-translational epigenetics: PRMT7 regulates RNA-binding capacity and protein stability to control Leishmania parasite virulence
Source: bioRxiv or medRxiv preprint supplement (doi:10.1101/736736), 2019-08-15
Supplement: Supplementary file [file media-1.pdf]

## **PRMT7 methylation controls *trans*-regulator function in *Leishmania* protozoa**

### **Supplemental Information**

#### **Supplemental Figure Legends**

**Supplemental Fig S1.** Multiple sequence alignment of all the annotated PRMTs in *L. major* (*Lmj*PRMTs) and *Homo sapiens* (*Hs*PRMTs). The double E loop is part of the catalytic domain of the PRMTs and is important for S-adenosyl-methionine (SAM) and protein substrate binding. The asterisk depicts the *Lmj*PRMT7 E202 residue mutated to generate catalytically inactive E202K and E202Q mutants *in vitro*.

**Supplemental Fig S2.** Endogenous FLAG-HA-tagging of *L. major* RBPs (A) Plasmid map of pFLAG\_HA plasmid, synthesized by GenScript for this work, with Alba3 5' flank region (5'FLR) and Alba3<sup>wgg</sup> mutant sequence in the "RBP-CDS" region. *Sfi*I enzyme sites used (A,B,C,D) produce different overhangs allowing the ligation of four different synthesized DNA sequences at the same time in a specific order (Fulwiler *et al.* 2011). Homologous sequences required for gene replacement are the 5'FLR (500bp) and the protein coding sequence (RBP-CDS, variable). (B) Primers that bind to the 5'FLR region of the gene and 3'FLR immediately downstream of the RBP-CDS but absent in the plasmid sequence were used to verify correct replacement of at least one allele by the HA-tagged gene. Expected PCR band sizes are shown for each tagged gene. (C) Positive clones were analyzed by PCR amplification of the modified HA-RBP allele (upper bands) and the original unmodified RBP allele (lower bands). DNA marker used was Gene Ruler 1kb (Thermo Fisher).

**Supplemental Fig S3.** (A) qPCR showing relative concentrations of transcript targets immunoprecipitated with HA-Alba3 in the presence or absence of PRMT7 levels relative to endogenous transcript levels. Alba3 transcript target nmt levels remain unchanged in the presence or absence of PRMT7 levels or the mutation of Alba3 RGG motifs to WGG. (B) Alba3 protein levels and stability are unaltered in the presence or absence of PRMT7 levels in log- or stat- stage promastigote cells. (C) Cytoplasmic HA-RBP16 levels display a reduced

half-life specifically in stat-stage human-infective promastigotes in the absence of PRMT7 expression.

**Supplemental Fig S4.** (A) Western blot examining endogenous levels of *Lmj*RBP16 using anti-*Tb*RBP16 (kind gift of L.Read). *Lmj*RBP16 protein levels are constant in the presence and absence of PRMT7 levels. (B-D) Immunofluorescence of Log and Stat stage promastigotes: DAPI (Blue), Mitotracker (Green), RBP (Red), line = 5 $\mu$ m. (B) Subcellular localisation of endogenous *Lmj*RBP16 using anti-*Tb*RBP16 shows mitochondrial localisation constant in promastigote lifecycle stages examined. (C) Subcellular localisation of endogenously-tagged HA-*Lmj*RBP16 using anti-HA shows cytoplasmic localisation that is destabilized specifically in the absence of PRMT7 levels in stationary (stat) stage promastigote cells. (D) Subcellular localisation of endogenously-tagged HA-*Lmj*Alba3 using anti-HA shows cytoplasmic localisation constant in promastigote lifecycle stages examined.

#### **Supplemental Table Legends**

**Supplemental Table S1.** Global monomethyl arginine peptides identified and quantified by heavy methyl SILAC analysis in WT and  $\Delta$ *prmt7* *Leishmania major*.

**Supplemental Table S2.** Methylpeptides from RNA-binding proteins (RBPs) that are differentially methylated between WT and  $\Delta$ *prmt7* *Leishmania major*. Proteins were considered RBPs if they present an RNA-binding domain or if they are orthologs of a validated *Trypanosoma brucei* RBP.

**Supplemental Table S3.** List of oligonucleotides used in this study for PCR or qRT-PCR.

## Double E loop in SAM binding domain

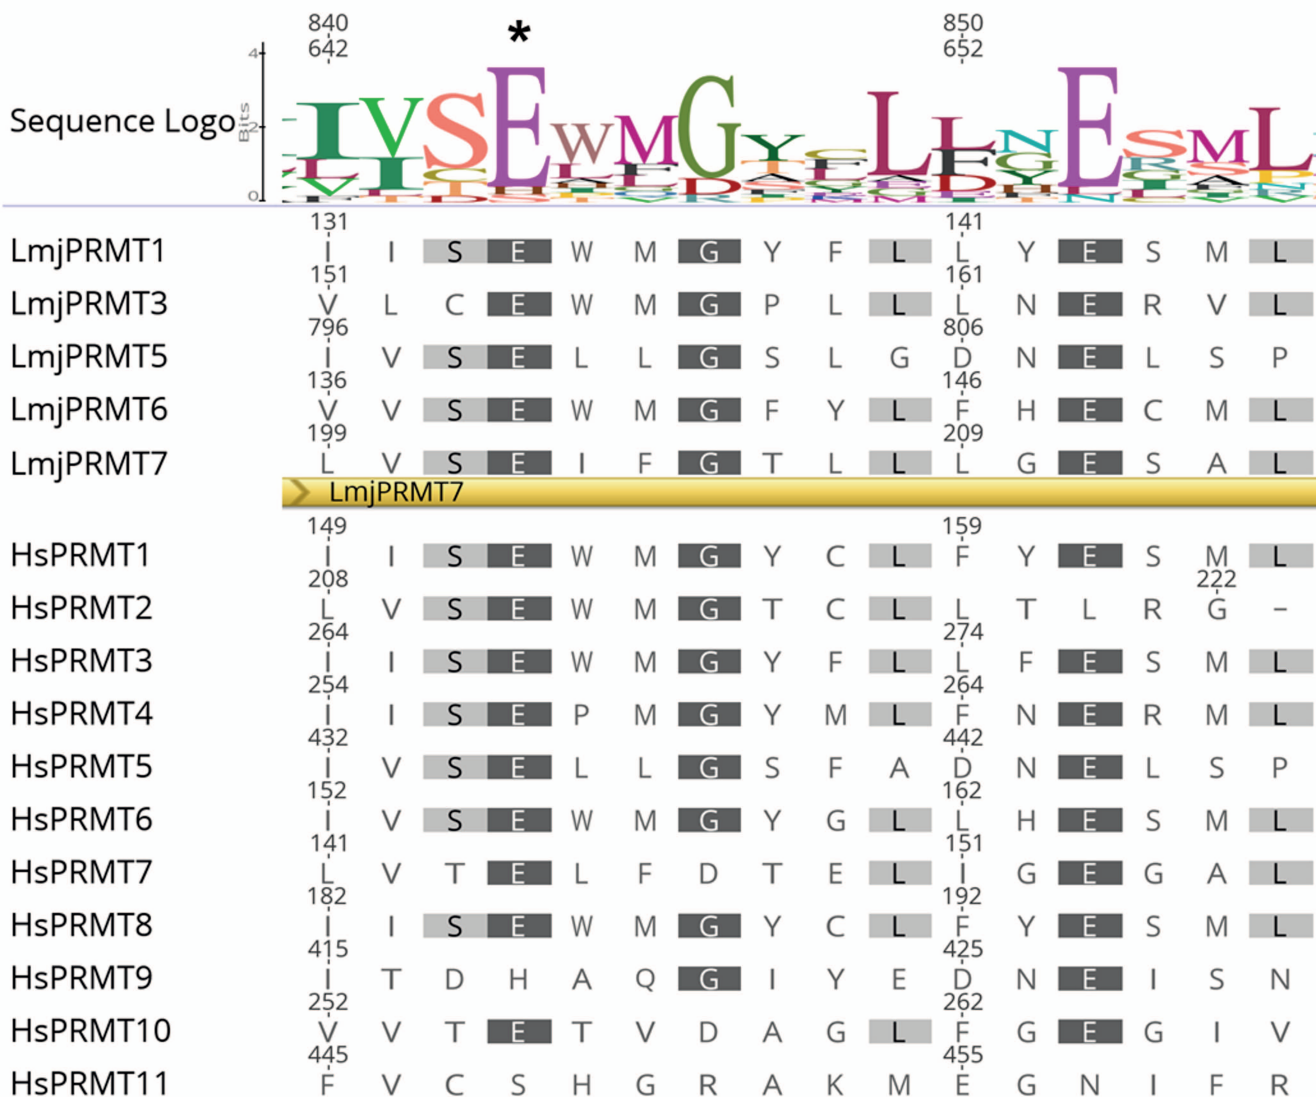

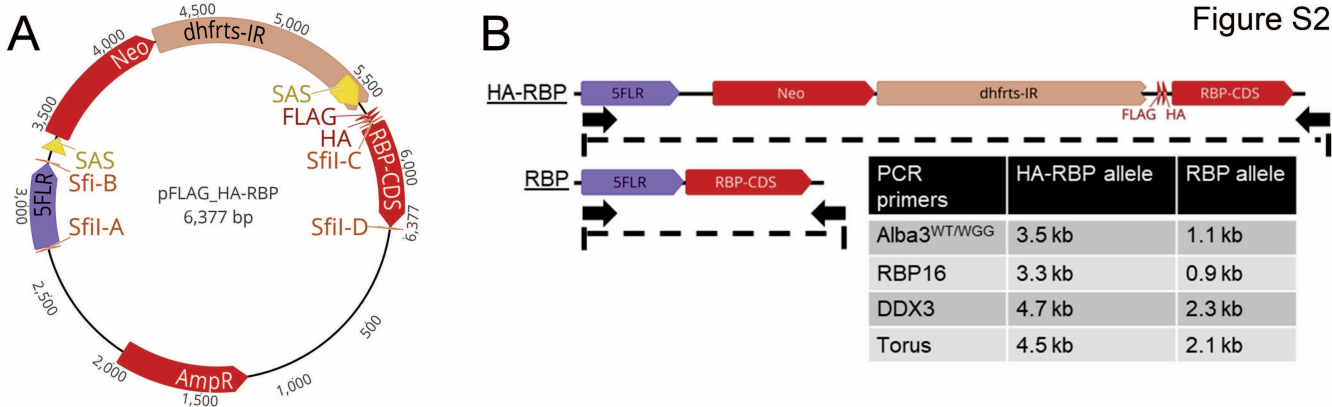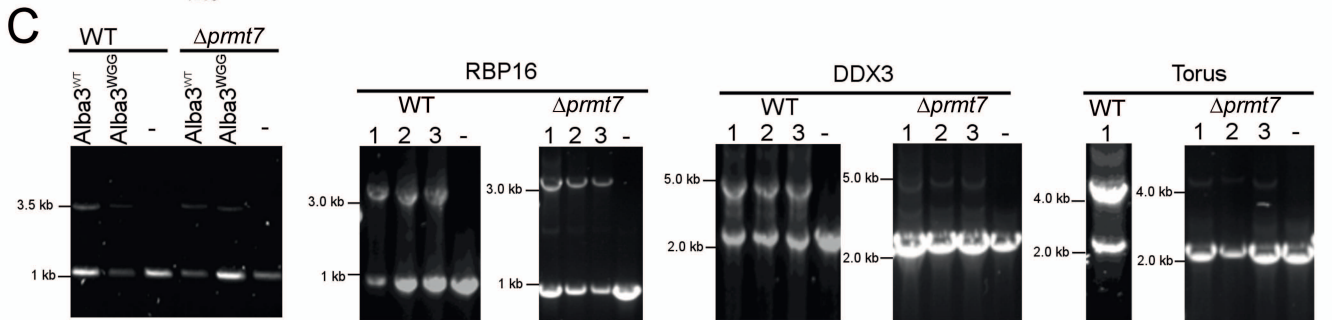

# Figure S3

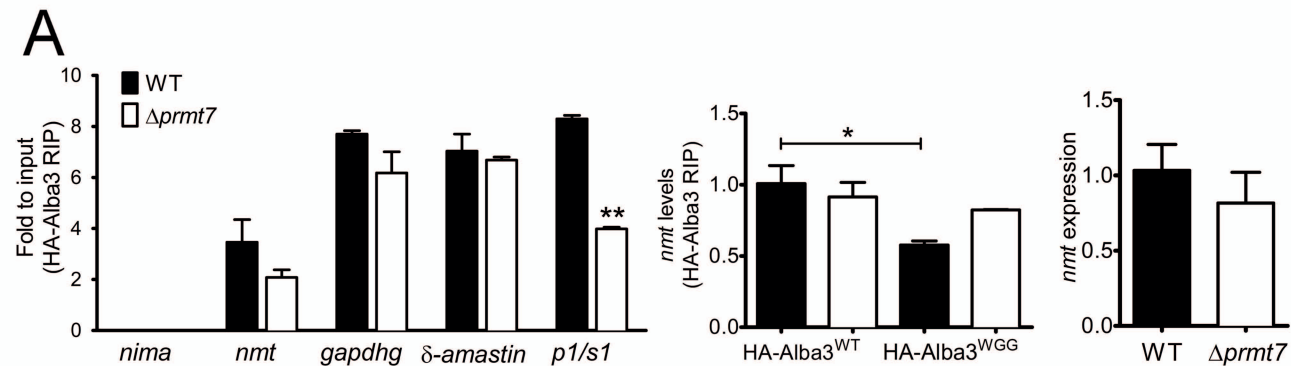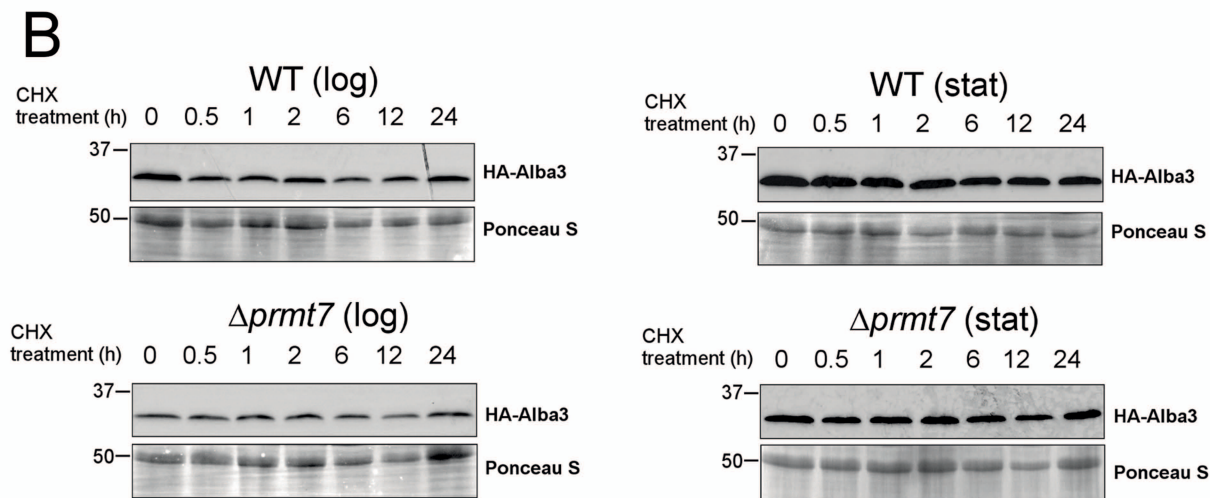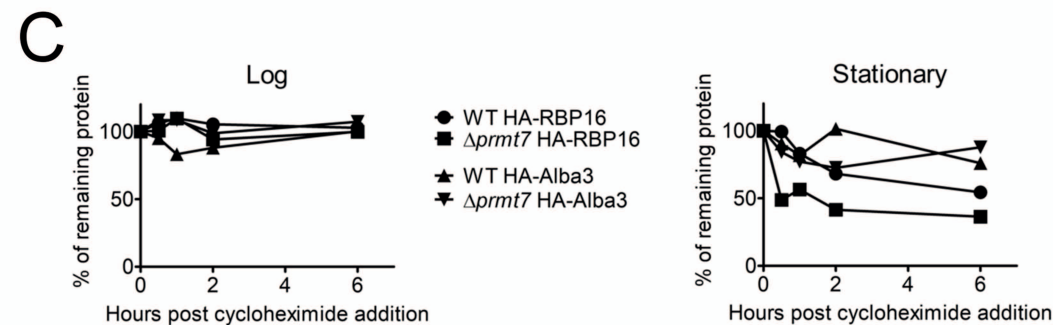

A

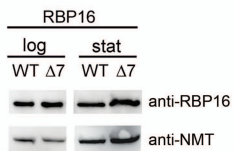

B

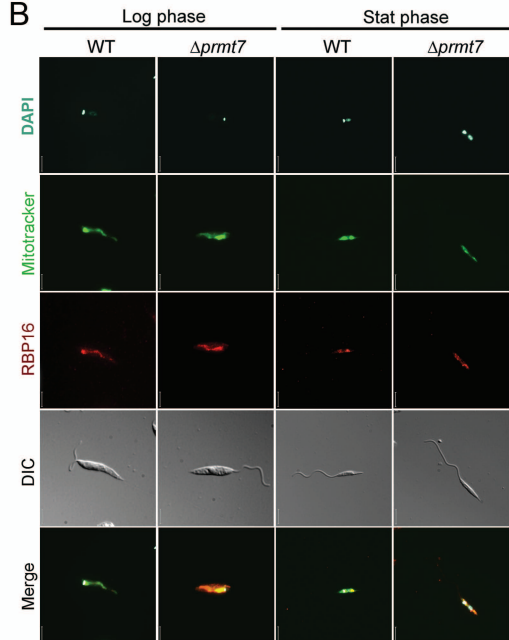

C

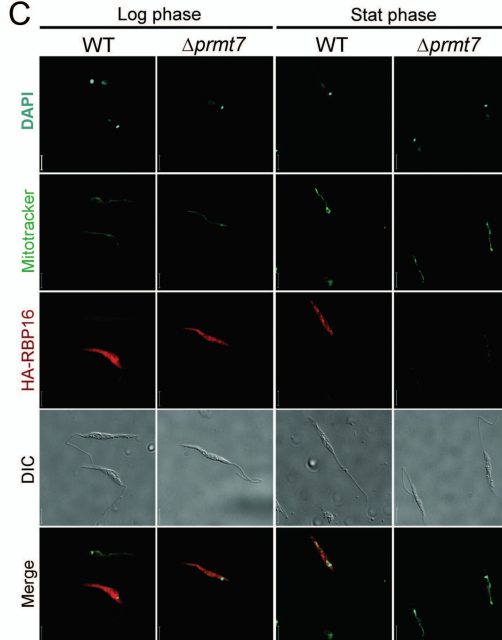

D

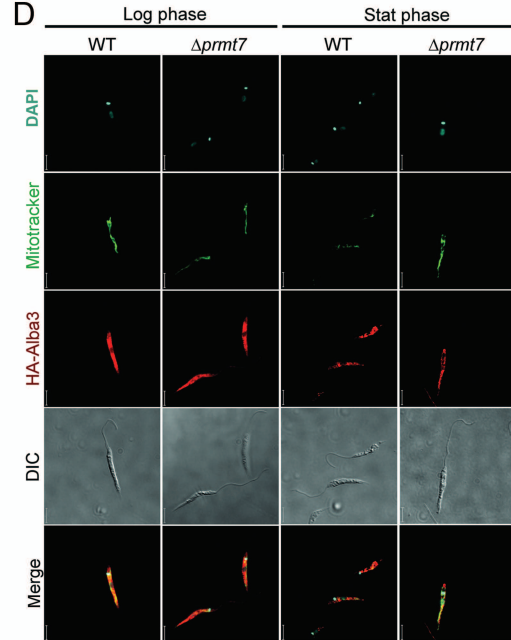

**Supplemental Table S1.** Global monomethyl arginine peptides identified and quantified by heavy methyl SILAC analysis in WT and  $\Delta$ prmt7 *Leishmania major*.

| Gene ID      | Product description                                                                                                                 | log2FC WT/Δ7 (methylpeptides) | q-value (H&B test) | Methyl/peptide sequence*                                                       | Modification site <sup>†</sup>                                                           |
|--------------|-------------------------------------------------------------------------------------------------------------------------------------|-------------------------------|--------------------|--------------------------------------------------------------------------------|------------------------------------------------------------------------------------------|
| LmjF.27.1680 | hypothetical protein, conserved (NXF1)                                                                                              | 41.28                         | 0.00E+00           | SGPSSGGVGLGNNGSRGGGR +3 Methyl x 2                                             | R26 Methyl<br>M3 Oxidation, R10 Methyl, M24 Oxidation                                    |
| LmjF.35.2200 | RNA-binding protein, putative                                                                                                       | 39.62                         | 0.00E+00           | HNMAGSAYGRGAPYQVGAESTEMNGTEPLKPR +5 Methyl x                                   |                                                                                          |
| LmjF.16.0730 | ubiquitin hydrolase, putative                                                                                                       | 38.04                         | 0.00E+00           | SGGRRGGGAGATNAPSVPSPSEVTEASAPPEPQTELEGR +methyl:2H(3)13C(1), R9 Methyl:2H(3)13 |                                                                                          |
| LmjF.10.0880 | hypothetical protein, conserved                                                                                                     | 37.47                         | 0.00E+00           | GRGGAEDAGPSAARGAGIPAVLR +4 Methyl x 2                                          | methyl:2H(3)13C(1), R15 Methyl:2H(3)13                                                   |
| LmjF.16.0730 | ubiquitin hydrolase, putative                                                                                                       | 35.85                         | 0.00E+00           | SGGRRGGGAGATNAPSVPSPSEVTEASAPPEPQTELEGR +methyl:2H(3)13C(1), R9 Methyl:2H(3)13 | M3 Oxidation, R10 Methyl, M24 Oxidation                                                  |
| LmjF.35.2200 | RNA-binding protein, putative                                                                                                       | 35.33                         | 0.00E+00           | HNMAGSAYGRGAPYQVGAESTEMNGTEPLKPR +4 Methyl x                                   |                                                                                          |
| LmjF.34.1110 | Shwachman-Bodian-Diamond syndrome (SBDS) protein/SBDS protein C-terminal domain cont                                                | 35.19                         | 0.00E+00           | LGLDPSHLQDDSDDDGGRGRGR +3 Methyl x 2 Phos x 1                                  | S13 Phospho, R21 Methyl<br>R2 Methyl:2H(3)13C(1), R5                                     |
| LmjF.25.0540 | hypothetical protein SCD6.10 (SCD6)                                                                                                 | 35.17                         | 0.00E+00           | GRGRRAAAAAASATAAASAATR +4 Methyl x 2                                           | Methyl:2H(3)13C(1), R5<br>R2 Methyl:2H(3)13C(1), R5                                      |
| LmjF.25.0540 | hypothetical protein SCD6.10 (SCD6)                                                                                                 | 34.51                         | 0.00E+00           | GRGRRAAAAAASATAAASAATR +3 Methyl x 2                                           | Methyl:2H(3)13C(1)                                                                       |
| LmjF.19.0380 | hypothetical protein, conserved                                                                                                     | 34.32                         | 0.00E+00           | RVPDSGASMASSGAGRGRGR +4 Methyl x 2                                             | R17 Methyl, R21 Methyl, R23 Methyl                                                       |
| LmjF.01.0260 | Calmodulin-binding, putative                                                                                                        | 34.10                         | 0.00E+00           | AQYDHSVSHGVRAGSAAAPSGSR +3 Methyl x 1                                          | R13 Methyl                                                                               |
| LmjF.14.0570 | WD domain, G-beta repeat, putative                                                                                                  | 7.33                          | 1.80E-18           | GGSSVGRGHATSGR +3 Methyl x 1                                                   | R7 Methyl:2H(3)13C(1)                                                                    |
| LmjF.34.2580 | ALBA-domain protein 3 (Alba3)                                                                                                       | 7.15                          | 1.15E-02           | GGRGVAAIDRR +3 Methyl x 1                                                      | R3 Methyl:2H(3)13C(1)                                                                    |
| LmjF.25.0290 | RNA-binding protein, putative                                                                                                       | 6.70                          | 4.96E-16           | SVARPPPPPPRIGR +4 Methyl x 2                                                   | R14 Methyl, R16 Methyl                                                                   |
| LmjF.27.1680 | hypothetical protein, conserved (NXF1)                                                                                              | 6.70                          | 1.94E-16           | SGPSSGGVGLGNNGSRGRGR +2 Methyl x 1                                             | R22 Methyl                                                                               |
| LmjF.27.0130 | WW domain/Zinc finger C-x8-C-x5-C-x3-H type (and similar), putative (ZFP3)                                                          | 6.58                          | 2.15E-07           | THWSIPPTAYEPYNNRGR +3 Methyl x 1                                               | R19 Methyl                                                                               |
| LmjF.32.2410 | hypothetical protein, conserved                                                                                                     | 6.54                          | 3.79E-03           | TSTGRAGSAAAGPDLHR +3 Methyl x 1                                                | R5 Methyl:2H(3)13C(1)<br>R3 Methyl:2H(3)13C(1), R7                                       |
| LmjF.32.1800 | hypothetical protein, conserved                                                                                                     | 6.28                          | 2.88E-16           | SGRSGARGSSSHNR +3 Methyl x 2                                                   | Methyl:2H(3)13C(1)                                                                       |
| LmjF.10.0280 | hypothetical protein, conserved                                                                                                     | 5.80                          | 8.74E-14           | GGRRGSLSR +3 Methyl x 1                                                        | R4 Methyl:2H(3)13C(1), R21<br>R19 Methyl:2H(3)13C(1), R21                                |
| LmjF.27.0130 | WW domain/Zinc finger C-x8-C-x5-C-x3-H type (and similar), putative (ZFP3)                                                          | 5.38                          | 3.17E-05           | THWSIPPTAYEPYNNRGR +4 Methyl x 2                                               | Methyl:2H(3)13C(1)                                                                       |
| LmjF.18.1420 | pumilio protein 2, putative (PUF2)                                                                                                  | 4.89                          | 3.54E-13           | DNRPGGVSSSGNGSGRGRGR +3 Methyl x 1                                             | R22 Methyl                                                                               |
| LmjF.26.0730 | hypothetical protein, conserved                                                                                                     | 4.63                          | 4.23E-12           | TSSRGGGSRENDVQPAEQQR +3 Methyl x 1 Phos x 1                                    | R5 Methyl                                                                                |
| LmjF.10.1110 | PAB1-binding protein, putative (PBP1)                                                                                               | 4.53                          | 4.97E-09           | KEAAATSAAAPAAATPAATATAGRGAAR +4 Methyl x 1                                     | R27 Methyl                                                                               |
| LmjF.34.1110 | Shwachman-Bodian-Diamond syndrome (SBDS) protein/SBDS protein C-terminal domain cont                                                | 4.44                          | 4.14E-11           | LGLDPSHLQDDSDDDGGRGR +3 Methyl x 1 Phos x 1                                    | S13 Phospho, R19 Methyl:2H(3)13C(1)                                                      |
| LmjF.19.0190 | multi-protein-bridging factor 1, putative (MBF1)                                                                                    | 4.39                          | 5.24E-11           | PRGAIPTGDDWEEQR +3 Methyl x 1                                                  | R2 Methyl                                                                                |
| LmjF.19.0190 | multi-protein-bridging factor 1, putative (MBF1)                                                                                    | 4.03                          | 1.81E-05           | PRGAIPTGDDWEEQRNFQQR +4 Methyl x 1                                             | R2 Methyl                                                                                |
| LmjF.25.0290 | RNA-binding protein, putative                                                                                                       | 3.92                          | 1.67E-12           | SVARPPPPPPRIGR +3 Methyl x 1                                                   | R14 Methyl:2H(3)13C(1)<br>R4 Methyl:2H(3)13C(1), M12                                     |
| LmjF.04.0570 | DENN (AEX-3) domain containing protein, putative                                                                                    | 3.88                          | 6.80E-06           | AYRGLGIESEMFDPVAR +3 Methyl x 1                                                | Label:13C(1)2H(3)                                                                        |
| LmjF.27.1300 | KH domain containing protein, putative                                                                                              | 3.69                          | 2.41E-13           | GRRGGGAGAPNDDAAR +3 Methyl x 2                                                 | R3 Methyl, R7 Methyl                                                                     |
| LmjF.15.0620 | hypothetical protein, conserved                                                                                                     | 3.64                          | 3.24E-12           | ASSHONGSNGAVIRGGGNAR +3 Methyl x 1                                             | R16 Methyl                                                                               |
| LmjF.22.0930 | mitochondrial chaperone, putative                                                                                                   | 3.45                          | 7.96E-12           | SDGAPAVRGGGGTGR +2 Methyl x 1                                                  | R18 Methyl                                                                               |
| LmjF.24.0820 | inositol polyphosphate phosphatase, putative                                                                                        | 3.22                          | 9.58E-08           | GRGGAAMHMTSAAGPSAR +3 Methyl x 1                                               | R2 Methyl                                                                                |
| LmjF.10.1110 | PAB1-binding protein, putative (PBP1)                                                                                               | 2.97                          | 5.67E-08           | EAATAASAAPAAATPAATATAGRGAAR +3 Methyl x 1                                      | R26 Methyl                                                                               |
| LmjF.24.1180 | Surfeit locus protein 6, putative (SURF6)                                                                                           | 2.77                          | 2.44E-07           | GARFPAPQRGGGASSR +3 Methyl x 1                                                 | IN/A                                                                                     |
| LmjF.26.0730 | hypothetical protein, conserved                                                                                                     | 2.61                          | 7.62E-07           | TSSRGGGSRENDVQPAEQQR +3 Methyl x 1                                             | R5 Methyl                                                                                |
| LmjF.24.0710 | Protein of unknown function (DUF523), putative                                                                                      | 2.60                          | 1.29E-04           | RPAASAAQR +3 Methyl x 1                                                        | IN/A                                                                                     |
| LmjF.25.1740 | mitochondrial RNA binding complex 1 subunit, putative                                                                               | 2.34                          | 2.94E-06           | SSGGRRGSSSFPVSGHGTGSGFNPR +3 Methyl x 1                                        | R6 Methyl:2H(3)13C(1)<br>R15 Methyl:2H(3)13C(1), M19                                     |
| LmjF.21.1350 | PB1 domain containing protein, putative                                                                                             | 2.15                          | 2.28E-03           | QASVSLTTSAGRRGAMAAR +3 Methyl x 1                                              | Label:13C(1)2H(3)                                                                        |
| LmjF.22.0930 | mitochondrial chaperone, putative                                                                                                   | 2.05                          | 3.87E-07           | SDGAPAVRGGGGTGR +3 Methyl x 1                                                  | R18 Methyl                                                                               |
| LmjF.36.5100 | hypothetical protein, conserved (PUF11)                                                                                             | 1.99                          | 1.16E-03           | GGYVGGGAGGAGIQQVYGAAPISR +3 Methyl x 1                                         | R28 Methyl                                                                               |
| LmjF.19.0190 | multi-protein-bridging factor 1, putative (MBF1)                                                                                    | 1.79                          | 5.55E-03           | FNQQRGGSSQAQR +3 Methyl x 1                                                    | R6 Methyl:2H(3)13C(1)                                                                    |
| LmjF.25.1740 | mitochondrial RNA binding complex 1 subunit, putative                                                                               | 1.75                          | 1.15E-03           | SSGGRRGSSSFPVSGHGTGSGFNPR +4 Methyl x 1                                        | R6 Methyl:2H(3)13C(1)                                                                    |
| LmjF.22.0930 | mitochondrial chaperone, putative                                                                                                   | 1.74                          | 1.83E-11           | SDGAPAVRGGGGTGR +3 Methyl x 1                                                  | R9 Methyl                                                                                |
| LmjF.05.0850 | zinc-finger of a C2HC-type, putative                                                                                                | 1.59                          | 1.16E-03           | CGSSGGGRRPAAWNSDVEVR +4 Methyl x 1                                             | R13 Methyl                                                                               |
| LmjF.14.0570 | WD domain, G-beta repeat, putative                                                                                                  | 1.56                          | 6.34E-04           | GGSSVGRGHATSGR +2 Methyl x 1                                                   | R7 Methyl:2H(3)13C(1)                                                                    |
| LmjF.33.1150 | pumilio protein 6, putative (PUF6)                                                                                                  | 1.49                          | 2.34E-04           | GSYEGMAGVTVYRGTGPTAK +3 Methyl x 1                                             | R15 Methyl                                                                               |
| LmjF.25.0540 | hypothetical protein SCD6.10 (SCD6)                                                                                                 | 1.44                          | 1.49E-03           | AAAAAASATAAASAATRGRSR +3 Methyl x 1                                            | R19 Methyl<br>M11 Label:13C(1)2H(3), M15<br>Label:13C(1)2H(3), R16<br>Methyl:2H(3)13C(1) |
| LmjF.25.0540 | hypothetical protein SCD6.10 (SCD6)                                                                                                 | 1.33                          | 4.90E-03           | KADTETGPEMVSRRGRF +3 Methyl x 1                                                | Methyl:2H(3)13C(1)                                                                       |
| LmjF.32.1800 | hypothetical protein, conserved                                                                                                     | 1.26                          | 1.19E-04           | RGASWAANTDTPPGGK +3 Methyl x 1                                                 | R1 Methyl                                                                                |
| LmjF.33.0260 | RGG-containing protein 2, putative (RGG2)                                                                                           | 1.25                          | 1.52E-04           | DSSDGGGRRGGHSGGGGDKDAPTGR +5 Methyl x 1                                        | R10 Methyl:2H(3)13C(1)                                                                   |
| LmjF.08.0520 | hypothetical protein, conserved                                                                                                     | 1.19                          | 2.37E-02           | SSRGGAAQAR +2 Methyl x 1                                                       | R3 Methyl                                                                                |
| LmjF.30.0090 | hypothetical protein, conserved                                                                                                     | 1.12                          | 3.00E-04           | IEGFRGGTVQSR +3 Methyl x 1                                                     | R6 Methyl                                                                                |
| LmjF.15.1310 | MGT1 magnesium transporter                                                                                                          | 0.91                          | 1.18E-03           | LVRPLSRGGAVVFGSR +3 Methyl x 1 Phos x 1                                        | S4 Phospho, R9 Methyl                                                                    |
| LmjF.13.0580 | hypothetical protein, conserved                                                                                                     | 0.82                          | 1.33E-03           | SGAARGGGIVSAPSK +3 Methyl x 1                                                  | R5 Methyl:2H(3)13C(1)<br>S3 Phospho, M8 Label:13C(1)2H(3),<br>R27 Methyl:2H(3)13C(1)     |
| LmjF.36.5850 | flagellum targeting protein kharon1, putative                                                                                       | 0.81                          | 2.88E-03           | RASLHNLMYASGDAYVASRGGQASR +4 Methyl x 1 Phos x 1                               | R27 Methyl:2H(3)13C(1)                                                                   |
| LmjF.31.2360 | hypothetical protein, conserved                                                                                                     | 0.73                          | 1.85E-02           | NYPNLDPPTEEALGSRGGTGGAYGR +3 Methyl x 1                                        | R28 Methyl                                                                               |
| LmjF.28.0825 | RNA binding protein rbp16, putative (RBP16)                                                                                         | 0.67                          | 2.34E-02           | LPSGRPPGSPSGR +3 Methyl x 1                                                    | IN/A                                                                                     |
| LmjF.33.1150 | pumilio protein 6, putative (PUF6)                                                                                                  | 0.64                          | 2.02E-02           | YNNNSAGGGVGGGRVGR +3 Methyl x 1                                                | R15 Methyl                                                                               |
| LmjF.05.0850 | zinc-finger of a C2HC-type, putative                                                                                                | 0.63                          | 5.07E-03           | CGSSGGGRRPAAWNSDVEVR +3 Methyl x 1                                             | R13 Methyl                                                                               |
| LmjF.24.1430 | kinesin, putative                                                                                                                   | 0.80                          | 1.29E-03           | NGGAAAGRRGCNAPALLDAPR +3 Methyl x 1                                            | R10 Methyl:2H(3)13C(1)                                                                   |
| LmjF.35.3100 | ATP-dependent RNA helicase, putative (DED1)                                                                                         | 0.475378065                   | 2.33E-02           | NYDDGGGEGYSRNSYGGGGYR +3 Methyl x 1                                            | R14 Methyl                                                                               |
| LmjF.32.0400 | ATP-dependent RNA helicase HEL67 (DXD3)                                                                                             | 0.398086975                   | 3.12E-03           | KPNVQNPQR +2 Methyl x 1                                                        | R9 Methyl                                                                                |
| LmjF.36.4590 | PHD-like zinc-binding domain containing protein, putative                                                                           | 0.38904051                    | 3.98E-02           | NSGGDTDSALGSSPTARGGAVGGGHAR +3 Methyl x 1                                      | R31 Methyl:2H(3)13C(1)                                                                   |
| LmjF.21.1030 | hypothetical protein, conserved                                                                                                     | 0.352663399                   | 4.92E-02           | GAGGPRPFAVDNDDANYSDDGGRRGR +3 Methyl x 1 Phos x 1                              | R27 Methyl:2H(3)13C(1)                                                                   |
| LmjF.04.0920 | hypothetical protein                                                                                                                | 0.319371052                   | 8.31E-03           | SRDAGCPSQALGRR +3 Methyl x 1                                                   | R12 Methyl                                                                               |
| LmjF.17.1030 | hypothetical protein, conserved                                                                                                     | 0.232130541                   | 5.40E-03           | SSRGGVPPQGSAAVAGGSPQLNR +3 Methyl x 1                                          | R4 Methyl                                                                                |
| LmjF.34.1360 | Nucleoporin NUP225                                                                                                                  | 0.212786983                   | 2.26E-04           | SGSAVNRGSSAAALEAYYQQQR +3 Methyl x 1                                           | R7 Methyl                                                                                |
| LmjF.31.2360 | hypothetical protein, conserved                                                                                                     | 0.161499462                   | 3.61E-03           | LQRGGYQALQGR +2 Methyl x 1                                                     | R3 Methyl                                                                                |
| LmjF.35.1510 | NLI interacting factor-like phosphatase/Zinc finger C-x8-C-x5-C-x3-H type (and similar), putative                                   | 0.126983206                   | 2.20E-03           | ANNNDHQHRGGGAR +3 Methyl x 1                                                   | R11 Methyl<br>R4 Methyl:2H(3)13C(1), M10<br>Label:13C(1)2H(3)+Oxidation                  |
| LmjF.36.0490 | zinc-finger of a C2HC-type, putative                                                                                                | -0.60                         | 2.30E-03           | FSSRGGGGMGGGGGGR +2 Methyl x 1                                                 | R2 Methyl                                                                                |
| LmjF.32.0850 | polypyrimidine tract-binding protein, putative (DRBD4)                                                                              | -0.75                         | 9.35E-03           | DRGGGAGSDCAKSDPAVQR +3 Methyl x 1                                              | R9 Methyl                                                                                |
| LmjF.23.0080 | hypothetical protein, conserved                                                                                                     | -0.79                         | 2.91E-03           | AVSAQVQARGR +2 Methyl x 1                                                      | R2 Methyl<br>M3 Label:13C(1)2H(3), R5<br>Methyl:2H(3)13C(1)                              |
| LmjF.36.4260 | hypothetical protein, conserved                                                                                                     | -0.81                         | 9.04E-03           | SSMARGGASPR +3 Methyl x 1                                                      | R9 Methyl                                                                                |
| LmjF.07.0340 | ATP-dependent RNA helicase DBP2B, putative                                                                                          | -1.05                         | 4.65E-03           | SGGGYGGRYGGYGGGR +2 Methyl x 1                                                 | R8 Methyl:2H(3)13C(1)                                                                    |
| LmjF.05.0850 | zinc-finger of a C2HC-type, putative                                                                                                | -1.70                         | 1.99E-07           | GAGGGGGGGGADAAAGAAK +3 Methyl x 1                                              | R8 Methyl:2H(3)13C(1)                                                                    |
| LmjF.05.0850 | zinc-finger of a C2HC-type, putative                                                                                                | -1.83                         | 2.01E-06           | GAGGGGGGGGADAAAGAAK +2 Methyl x 1                                              | R8 Methyl:2H(3)13C(1)                                                                    |
| LmjF.30.0760 | hypothetical protein, conserved                                                                                                     | -2.50                         | 9.72E-07           | RRGGGDDVAAGGNEGR +3 Methyl x 1                                                 | R1 Methyl:2H(3)13C(1)                                                                    |
| LmjF.15.0800 | hypothetical protein, conserved                                                                                                     | -2.50                         | 6.17E-03           | RRGGGDSGAVDR +3 Methyl x 1                                                     | R1 Methyl                                                                                |
| LmjF.32.0840 | hypothetical protein, conserved (DRBD18)                                                                                            | -3.01                         | 4.02E-04           | GRRGGSGFGSQPTNTSIR +3 Methyl x 1                                               | R3 Methyl                                                                                |
| LmjF.07.0340 | ATP-dependent RNA helicase DBP2B, putative                                                                                          | -3.57                         | 7.25E-09           | DGGYGGYGGRRGGR +3 Methyl x 1                                                   | R12 Methyl:2H(3)13C(1)<br>R2 Methyl:2H(3)13C(1), M5<br>Label:13C(1)2H(3)                 |
| LmjF.36.6980 | eukaryotic translation initiation factor 3 subunit c                                                                                | -3.62                         | 1.35E-08           | GRGMAAGR +2 Methyl x 1                                                         | R14 Methyl                                                                               |
| LmjF.25.0540 | hypothetical protein SCD6.10 (SCD6)                                                                                                 | -3.65                         | 7.62E-08           | DPAIEVHAPARGR +3 Methyl x 1                                                    | R14 Methyl                                                                               |
| LmjF.32.1800 | hypothetical protein, conserved                                                                                                     | -3.83                         | 1.17E-03           | GGQIRGGHSAQR +3 Methyl x 1                                                     | R6 Methyl:2H(3)13C(1)                                                                    |
| LmjF.27.1300 | KH domain containing protein, putative                                                                                              | -3.96                         | 5.52E-11           | GGRRGAGAPNDDAAR +2 Methyl x 1                                                  | R4 Methyl:2H(3)13C(1)                                                                    |
| LmjF.34.4290 | nucleolar protein family a, putative                                                                                                | -4.11                         | 1.44E-10           | LTFEPKPR +3 Methyl x 1                                                         | R9 Methyl:2H(3)13C(1)                                                                    |
| LmjF.27.1680 | hypothetical protein, conserved (NXF1)                                                                                              | -4.66                         | 4.15E-10           | SGPSSGGVGLGNNGSRGGGR +3 Methyl x 1                                             | R22 Methyl                                                                               |
| LmjF.36.5100 | hypothetical protein, conserved (PUF11)                                                                                             | -5.37                         | 8.50E-14           | GGPGLQRGR +2 Methyl x 1                                                        | R8 Methyl:2H(3)13C(1)<br>M16 Label:13C(1)2H(3), R17                                      |
| LmjF.31.0080 | hypothetical protein, conserved (ZC3H34)<br>CUE domain/Domain of unknown function (DUF1771)/Smr domain containing protein, putative | -5.82                         | 6.18E-07           | GGWYPSAGSGYNNMR +2 Methyl x 1                                                  | R1 Methyl                                                                                |
| LmjF.01.0210 | CUE domain/Domain of unknown function (DUF1771)/Smr domain containing protein, putative                                             | -3.88                         | 3.32E-01           | RGGSQQDNVAR +2 Methyl x 1                                                      | R1 Methyl                                                                                |
| LmjF.01.0210 | CUE domain/Domain of unknown function (DUF1771)/Smr domain containing protein, putative                                             | 0.00                          | 1.00E+00           | RGGSQQDNVAR +3 Methyl x 1                                                      | R1 Methyl                                                                                |
| LmjF.01.0260 | Calmodulin-binding, putative                                                                                                        | 0.00                          | 1.00E+00           | LGSPCAPGASASGGGGTSDASGAASCVGAPNR +3 Methyl                                     | R36 Methyl                                                                               |
| LmjF.01.0260 | Calmodulin-binding, putative                                                                                                        | 0.00                          | 1.00E+00           | LGSPCAPGASASGGGGTSDASGAASCVGAPNR +3 Met                                        | R36 Methyl:2H(3)13C(1)                                                                   |
| LmjF.01.0540 | hypothetical protein, conserved                                                                                                     | -0.42                         | 6.83E-01           | RGVYVPHLDFCEPLPR +4 Methyl x 1                                                 | R1 Methyl:2H(3)13C(1)                                                                    |
| LmjF.01.0620 | hypothetical protein, conserved                                                                                                     | 2.69                          | 8.39E-01           | QARGLNTSGASAIR +3 Methyl x 1                                                   | R3 Methyl                                                                                |
| LmjF.01.0680 | hypothetical protein, unknown function                                                                                              | 0.35                          | 1.00E+00           | ARGGCTVQR +2 Methyl x 1                                                        | R2 Methyl:2H(3)13C(1)                                                                    |

|              |                                                                                            |       |                                                                                          |                                                                                                     |
|--------------|--------------------------------------------------------------------------------------------|-------|------------------------------------------------------------------------------------------|-----------------------------------------------------------------------------------------------------|
| LmjF.01.0740 | hypothetical protein, conserved                                                            | 0.00  | 1.00E+00 RSRGGAALR +3 Methyl x 1                                                         | R3 Methyl:2H(3)13C(1)                                                                               |
| LmjF.01.0740 | hypothetical protein, conserved                                                            | 0.06  | 1.07E+00 SRGGAALR +2 Methyl x 1                                                          | R2 Methyl:2H(3)13C(1)                                                                               |
| LmjF.02.0530 | hypothetical protein, conserved                                                            | 0.00  | 1.00E+00 IAANGRRGPNDR +3 Methyl x 1                                                      | R6 Methyl:2H(3)13C(1), M17<br>R9 Methyl:2H(3)13C(1), M17                                            |
| LmjF.02.0560 | hypothetical protein, unknown function                                                     | -0.73 | 8.39E-01 GVDGVSRTGGGGQPIPIR +3 Methyl x 1                                                | Label:13C(1)2H(3)                                                                                   |
| LmjF.02.0660 | Nop14-like family, putative                                                                | 0.99  | 1.00E+00 SGHRGAGGYTASEMEVR +3 Methyl x 1                                                 | R5 Methyl                                                                                           |
| LmjF.03.0260 | hypothetical protein, conserved                                                            | -1.00 | 1.09E+00 YGSPKAGVDGR +2 Methyl x 1                                                       | #N/A                                                                                                |
| LmjF.03.0350 | protein kinase, putative                                                                   | 1.85  | 1.00E+00 EVVAASSAGAVAGRANMSR +3 Methyl x 1                                               | #N/A                                                                                                |
| LmjF.03.0560 | hypothetical protein                                                                       | -1.28 | 8.55E-01 AVYTGVAATSPAARGGACGTMLSTK +3 Methyl x 1                                         | R16 Methyl:2H(3)13C(1), M23                                                                         |
| LmjF.03.0600 | arginine N-methyltransferase, putative (PRMT3)                                             | -0.11 | 9.43E-01 TGAPTQGRSE +2 Methyl x 1                                                        | Label:13C(1)2H(3)                                                                                   |
| LmjF.03.0800 | 6-phosphofructo-2-kinase 1                                                                 | -1.13 | 5.01E-01 VGRGGATGGAVASDSEEEALLR +3 Methyl x 1 Phos x 1                                   | R7 Methyl                                                                                           |
| LmjF.03.0800 | 6-phosphofructo-2-kinase 1                                                                 | -0.63 | 2.08E-01 VGRGGATGGAVASDSEEEALLR +3 Methyl x 1                                            | R3 Methyl                                                                                           |
| LmjF.03.0800 | 6-phosphofructo-2-kinase 1                                                                 | -0.34 | 1.06E+00 SRGTSLVSAASQLATHAR +4 Methyl x 1                                                | R2 Methyl                                                                                           |
| LmjF.03.0800 | 6-phosphofructo-2-kinase 1                                                                 | 0.00  | 1.00E+00 RVRGGGATGGAVASDSEEEALLR +4 Methyl x 1                                           | R4 Methyl                                                                                           |
| LmjF.03.0800 | 6-phosphofructo-2-kinase 1                                                                 | 0.00  | 1.00E+00 SRGTSLVSAASQLATHAR +3 Methyl x 1                                                | R2 Methyl                                                                                           |
| LmjF.03.0820 | hypothetical protein, conserved                                                            | -0.15 | 1.00E+00 ARGGGVAVQQQR +2 Methyl x 1                                                      | R2 Methyl                                                                                           |
| LmjF.04.0830 | hypothetical protein, conserved                                                            | 0.66  | 1.05E+00 GRGGLTQPR +2 Methyl x 1                                                         | R2 Methyl:2H(3)13C(1)                                                                               |
| LmjF.04.0920 | hypothetical protein                                                                       | 0.66  | 1.20E-01 DAGSQPQLRGGIR +3 Methyl x 1                                                     | R10 Methyl                                                                                          |
| LmjF.05.0140 | nucleolar RNA helicase II, putative                                                        | -2.30 | 1.68E-01 GGFNYGGGGRRGPGVGNR +3 Methyl x 1                                                | R9 Methyl:2H(3)13C(1)                                                                               |
| LmjF.05.0140 | nucleolar RNA helicase II, putative                                                        | -0.62 | 8.17E-01 GGRGFNYGGGR +2 Methyl x 1                                                       | #N/A                                                                                                |
| LmjF.05.0300 | hypothetical protein, conserved                                                            | -1.01 | 1.03E+00 GSAPDNSAVGRRGR +3 Methyl x 1                                                    | #N/A                                                                                                |
| LmjF.05.0370 | hypothetical protein, conserved                                                            | 0.25  | 8.21E-01 RGGAAATCAQGFIFEDPAVTMAR +3 Methyl x 1                                           | R1 Methyl                                                                                           |
| LmjF.05.0640 | Ankyrin repeats (many copies)/Ankyrin repeats (3 copies), putative                         | 0.00  | 1.00E+00 HQQAPSYAADVMDGDPGVNYPLGGTGGSSSARGR +4 Methyl                                    | R34 Methyl                                                                                          |
| LmjF.05.0720 | phosphatase-like protein                                                                   | -0.48 | 1.00E+00 QQLNALIPVMSPSYTFAGPAPTRGGAK +3 Methyl x 1 Phos x 1                              | #N/A                                                                                                |
| LmjF.05.0850 | zinc-finger of a C2HC-type, putative                                                       | 2.27  | 8.68E-02 GSGGGGGRRRPAWNSDVEVR +2 Methyl x 1                                              | R13 Methyl                                                                                          |
| LmjF.05.0850 | zinc-finger of a C2HC-type, putative                                                       | 0.01  | 3.46E-01 GPAASSPAAGASGLVTSAGRGYGSNDEEAGNAYMPQQPS!                                        | S5 Phospho, R23 Methyl                                                                              |
| LmjF.05.0850 | zinc-finger of a C2HC-type, putative                                                       | 8.42  | 4.62E-01 SGGGGGGAGGGGGGGGADAAAGAAK +4 Methyl x 2                                         | R8 Methyl, R16 Methyl                                                                               |
| LmjF.05.0850 | zinc-finger of a C2HC-type, putative                                                       | 8.04  | 1.06E+00 SGGGGGGAGGGGGGGGADAAAGAAK +3 Methyl x 2                                         | R8 Methyl, R16 Methyl                                                                               |
| LmjF.05.1190 | hypothetical protein, conserved                                                            | 0.85  | 4.19E-01 RGGGNSAAAPR +3 Methyl x 1                                                       | R1 Methyl:2H(3)13C(1)                                                                               |
| LmjF.05.1190 | hypothetical protein, conserved                                                            | 0.04  | 2.19E-01 RGGGNSAAAPR +2 Methyl x 1                                                       | R1 Methyl:2H(3)13C(1)                                                                               |
| LmjF.06.0460 | ATP-NAD kinase-like protein                                                                | -0.07 | 1.07E+00 SPLRGGVDTTR +2 Methyl x 1                                                       | R5 Methyl:2H(3)13C(1)                                                                               |
| LmjF.06.0550 | hypothetical protein, conserved                                                            | -0.35 | 9.78E-01 QLRGGSPR +2 Methyl x 1                                                          | R3, R12                                                                                             |
| LmjF.06.0640 | STE/STE11 serine/threonine-protein kinase, putative                                        | 0.62  | 1.17E-01 RGGAGASTPAPPLVPLDAVDVK +3 Methyl x 1 Phos x 1                                   | R1 Methyl, S12 Phospho                                                                              |
| LmjF.06.0810 | hypothetical protein, unknown function                                                     | -0.39 | 9.25E-01 GARGGGGSSSSASPTSR +2 Methyl x 1                                                 | R3 Methyl:2H(3)13C(1)                                                                               |
| LmjF.06.0810 | hypothetical protein, unknown function                                                     | -0.18 | 8.59E-01 GARGGGGSSSSASPTSR +3 Methyl x 1                                                 | R3 Methyl:2H(3)13C(1)                                                                               |
| LmjF.06.0940 | STE/STE11 serine/threonine-protein kinase, putative                                        | -0.74 | 1.04E+00 AAVSSSNAAMSVSHGADIVVPSRGR +4 Methyl x 1                                         | M12 Label:13C(1)2H(3), R27<br>Methyl:2H(3)13C(1)                                                    |
| LmjF.06.0970 | Domain of unknown function (DUF3883), putative                                             | -0.13 | 1.09E+00 SGTASALRGGGGGAER +3 Methyl x 1                                                  | #N/A                                                                                                |
| LmjF.07.0340 | ATP-dependent RNA helicase DBP2B, putative                                                 | -0.67 | 2.61E-01 SGGVGGGGYGGYGGGR +3 Methyl x 1                                                  | R9 Methyl                                                                                           |
| LmjF.07.0340 | ATP-dependent RNA helicase DBP2B, putative                                                 | -0.90 | 8.65E-01 SGGVGGGGYGGYGGGR +3 Methyl x 2                                                  | R9 Methyl                                                                                           |
| LmjF.07.0490 | hypothetical protein, conserved                                                            | -0.42 | 2.15E-01 VVSSSIHGGRGRTN +2 Methyl x 1                                                    | R11 Methyl:2H(3)13C(1)                                                                              |
| LmjF.07.0490 | hypothetical protein, conserved                                                            | -0.21 | 1.09E+00 VVSSSIHGGRGRTN +3 Methyl x 1                                                    | R11 Methyl:2H(3)13C(1)                                                                              |
| LmjF.07.0740 | hypothetical protein, conserved                                                            | 2.49  | 7.84E-01 AVTAAGRGTVDHEGAFTSMR +3 Methyl x 1                                              | #N/A                                                                                                |
| LmjF.07.0870 | splicing factor ptrs1-like protein                                                         | 1.19  | 8.54E-01 RGGYGSDR +2 Methyl x 1                                                          | R1 Methyl                                                                                           |
| LmjF.07.0940 | Domain of unknown function (DUF3437), putative                                             | -0.46 | 1.00E+00 LLPATTAAVESPGYNGRAGQPLVLPSTPAVIGVAPSATLR +4 Me!                                 | R19 Methyl:2H(3)13C(1)                                                                              |
| LmjF.08.0110 | hypothetical protein, unknown function                                                     | -1.72 | 1.00E+00 MGSGLRGLSPSPAAQPIYNDIASR +3 Methyl x 1                                          | M1 Label:13C(1)2H(3), R6<br>Methyl:2H(3)13C(1)                                                      |
| LmjF.08.0620 | hypothetical protein, conserved                                                            | -0.67 | 4.36E-01 SGAAVVRGGPSLAVLSAQSPPLSVLGGAAEAASSSNR +3                                        | R8 Methyl, R43 Methyl:2H(3)13C(1)                                                                   |
| LmjF.08.0620 | hypothetical protein, conserved                                                            | 0.98  | 1.06E+00 SGAAVVRGGPSLAVLSAQSPPLSVLGGAAEAASSSNR +5                                        | R8 Methyl, R43 Methyl:2H(3)13C(1)                                                                   |
| LmjF.08.0620 | hypothetical protein, conserved                                                            | 1.43  | 3.78E-01 SPGAVGGGGGRTTSSSAAASANTAGANR +3 Methyl x 1                                      | R11 Methyl                                                                                          |
| LmjF.08.0620 | hypothetical protein, conserved                                                            | -0.58 | 8.47E-01 SGAAVVRGGPSLAVLSAQSPPLSVLGGAAEAASSSNR +4                                        | R8 Methyl, R43 Methyl:2H(3)13C(1)                                                                   |
| LmjF.08.0620 | hypothetical protein, conserved                                                            | 0.32  | 1.21E-01 SGAAVVRGGPSLAVLSAQSPPLSVLGGAAEAASSSNR +4                                        | R8 Methyl, R43 Methyl:2H(3)13C(1)                                                                   |
| LmjF.08.0880 | SET domain containing protein, putative                                                    | 0.66  | 1.04E+00 HMGIDLSNQAAGTHASGCIHRGGNSDGV +5 Methyl x 1                                      | #N/A                                                                                                |
| LmjF.08.1000 | AAA domain (dynein-related subfamily)/von Willebrand factor type A domain containing prote | -0.40 | 4.70E-01 NSASAAPACRGR +2 Methyl x 1                                                      | R11 Methyl                                                                                          |
| LmjF.08.1250 | hypothetical protein, conserved                                                            | 0.00  | 1.00E+00 DADGSCWIGVSPATQPPQFAPRGGAGTCDR +3 Methyl x                                      | R25 Methyl:2H(3)13C(1)<br>R1 Methyl:2H(3)13C(1), M33<br>Label:13C(1)2H(3)                           |
| LmjF.09.0390 | hypothetical protein, conserved                                                            | 1.26  | 1.06E+00 RGGGGGGGNSGGTVDVDPDPSNTQTPTSSMNGGGGR +4                                         | R10 Methyl                                                                                          |
| LmjF.09.0520 | Flagellum attachment zone protein 3                                                        | -1.02 | 7.70E-01 ASRGGAAATPRPSTAPPSPENNAADILADENMR +4 Methyl x 1                                 | R10 Methyl                                                                                          |
| LmjF.09.0520 | Flagellum attachment zone protein 3                                                        | 0.05  | 1.00E+00 ASRGGAAATPRPSTAPPSPENNAADILADENMR +4 Methyl x 1 Ph                              | R10 Methyl                                                                                          |
| LmjF.09.0530 | leucine-rich repeat protein, putative                                                      | -0.48 | 1.00E+00 QRGGGGGGDALASMR +3 Methyl x 1                                                   | #N/A                                                                                                |
| LmjF.09.0540 | hypothetical protein, unknown function                                                     | -0.18 | 9.25E-01 VRGSSGFGGR +2 Methyl x 1                                                        | R2 Methyl                                                                                           |
| LmjF.09.0540 | hypothetical protein, unknown function                                                     | 0.26  | 1.09E+00 VRGSSGFGGR +3 Methyl x 1                                                        | R2 Methyl                                                                                           |
| LmjF.09.0620 | hypothetical protein, conserved                                                            | -0.12 | 3.44E-01 AQTSPNGRGGAVEPNPDLQR +3 Methyl x 1                                              | R10 Methyl                                                                                          |
| LmjF.09.0750 | acyl-CoA binding protein, putative                                                         | 1.23  | 1.00E+00 LPTVRRGGPHAAVPSVSSPGIESALAGGCHSTGIAGVEDALVQN                                    | R6 Methyl:2H(3)13C(1)                                                                               |
| LmjF.09.1180 | hypothetical protein, conserved                                                            | 2.29  | 1.06E+00 NLGDEGLDSEVSSSESMSPPCPANTTTVPNGRAR +4 Me!                                       | #N/A                                                                                                |
| LmjF.09.1440 | Dnal domain containing protein, putative                                                   | -0.08 | 1.07E+00 NHRGGPNK +2 Methyl x 1                                                          | R3 Methyl:2H(3)13C(1)                                                                               |
| LmjF.10.1110 | PAB1-binding protein, putative (PBP1)                                                      | 0.00  | 1.00E+00 RGGMATAAR +2 Methyl x 1                                                         | R1 Methyl                                                                                           |
| LmjF.10.1110 | PAB1-binding protein, putative (PBP1)                                                      | -0.35 | 1.00E+00 KEAAATSAAPAAPATPAATATAGRGAAR +3 Methyl x 1                                      | R27 Methyl                                                                                          |
| LmjF.10.1130 | hypothetical protein, conserved                                                            | -1.23 | 1.05E+00 MAAALSFTR +3 Methyl x 1                                                         | #N/A                                                                                                |
| LmjF.11.0600 | hypothetical protein, conserved                                                            | 0.00  | 1.00E+00 YSEGHGGGSRGGGQR +3 Methyl x 1                                                   | R12 Methyl                                                                                          |
| LmjF.11.0820 | hypothetical protein, conserved                                                            | -1.84 | 2.71E-01 QQQMDMNFGR +2 Methyl x 1                                                        | R11 Methyl                                                                                          |
| LmjF.11.0820 | hypothetical protein, conserved                                                            | -1.08 | 4.74E-01 MQMPPPPQQYSR +2 Methyl x 1                                                      | R13 Methyl                                                                                          |
| LmjF.11.0820 | hypothetical protein, conserved                                                            | -0.54 | 4.80E-01 QQQMDMNFGRSQSQYNPAPNTGYPQR +3 Methyl x 1                                        | M4 Label:13C(1)2H(3), M6<br>Label:13C(1)2H(3), R11<br>Methyl:2H(3)13C(1)                            |
| LmjF.11.0830 | hypothetical protein, conserved                                                            | 0.97  | 1.03E+00 SIGYARGGGGGAGDK +2 Methyl x 1                                                   | #N/A                                                                                                |
| LmjF.11.1330 | Flagellar-associated PapD-like, putative                                                   | -0.24 | 1.21E-01 GRGGGAGAAASSSSASK +3 Methyl x 1                                                 | R2 Methyl:2H(3)13C(1)                                                                               |
| LmjF.11.1330 | Flagellar-associated PapD-like, putative                                                   | 0.40  | 1.04E+00 GRGGGAGAAASSSSASK +2 Methyl x 1                                                 | R2 Methyl:2H(3)13C(1)                                                                               |
| LmjF.12.0320 | Myotubularin-related protein, putative                                                     | 0.00  | 1.00E+00 CCLGRGGAPVSGEAE +3 Methyl x 1                                                   | #N/A                                                                                                |
| LmjF.12.1110 | Dnal domain containing protein, putative                                                   | 0.65  | 1.01E+00 GARGGGVPPSSMASPVDPAAPAAGAA +3 Methyl x 1                                        | #N/A                                                                                                |
| LmjF.12.1180 | hypothetical protein, conserved                                                            | 0.82  | 1.00E+00 SAQRGGTNAANGSGGGGPTSYR +3 Methyl x 1                                            | R4 Methyl:2H(3)13C(1)                                                                               |
| LmjF.13.0580 | hypothetical protein, conserved                                                            | -2.64 | 8.73E-01 WGPSALSATATPPSNRAGAVNNR +3 Methyl x 1                                           | R18 Methyl                                                                                          |
| LmjF.13.0580 | hypothetical protein, conserved                                                            | 0.28  | 3.33E-01 SGAARGGGVSPASK +2 Methyl x 1                                                    | R5 Methyl:2H(3)13C(1)                                                                               |
| LmjF.13.0700 | kinesin, putative                                                                          | 0.00  | 1.00E+00 QRGGGGAPPLAAALVQR +3 Methyl x 1                                                 | #N/A                                                                                                |
| LmjF.13.0810 | hypothetical protein, conserved                                                            | -0.02 | 1.69E-01 GAAAVFGSASRGGAVNR +3 Methyl x 1                                                 | #N/A                                                                                                |
| LmjF.13.0880 | hypothetical protein, conserved                                                            | 0.10  | 2.77E-01 RGMGSHSQSQSQR +2 Methyl x 1                                                     | R1 Methyl                                                                                           |
| LmjF.13.0880 | hypothetical protein, conserved                                                            | -0.14 | 1.09E+00 RGMGSHSQSQSQR +3 Methyl x 1                                                     | R1 Methyl                                                                                           |
| LmjF.13.1130 | Uncharacterised ACR, YagE family COG1723, putative                                         | -0.93 | 1.00E+00 HSYRGGGNAASGYRSDSLATANCSVALLSR +4 Methyl x 1 PI                                 | R4 Methyl, S13 Phospho                                                                              |
| LmjF.13.1130 | Uncharacterised ACR, YagE family COG1723, putative                                         | -0.46 | 1.00E+00 DNLEDDAALLALSDVDVGGVGRGR +3 Methyl x 1                                          | S15 Phospho, R28 Methyl                                                                             |
| LmjF.13.1130 | Uncharacterised ACR, YagE family COG1723, putative                                         | -0.45 | 7.60E-01 HSYRGGGNAASGYR +3 Methyl x 1                                                    | R4 Methyl                                                                                           |
| LmjF.13.1130 | Uncharacterised ACR, YagE family COG1723, putative                                         | -0.39 | 8.18E-01 SLAPKDNLEDDAALLALSDVDVGGVGRGR +4 Methyl x 1 S21 Phospho, R34 Methyl:2H(3)13C(1) |                                                                                                     |
| LmjF.13.1130 | Uncharacterised ACR, YagE family COG1723, putative                                         | -0.25 | 9.31E-01 HSYRGGGNAASGYR +2 Methyl x 1                                                    | R4 Methyl                                                                                           |
| LmjF.13.1130 | Uncharacterised ACR, YagE family COG1723, putative                                         | 0.00  | 1.00E+00 SLAPKDNLEDDAALLALSDVDVGGVGRGR +3 Methyl x 1 S21 Phospho, R34 Methyl:2H(3)13C(1) |                                                                                                     |
| LmjF.14.0570 | WD domain, G-beta repeat, putative                                                         | 0.00  | 1.00E+00 GSRGSSYGR +2 Methyl x 1                                                         | R3 Methyl                                                                                           |
| LmjF.15.0290 | hypothetical protein, conserved                                                            | 0.50  | 8.73E-01 LADTLSCFNRRGGGGGAR +3 Methyl x 1                                                | R1 Methyl                                                                                           |
| LmjF.15.0360 | RNA pseudouridylate synthase, putative                                                     | -0.53 | 1.00E+00 QLTRGGGASLLAWAALQPVSGVGAAPAR +3 Methyl x 1                                      | R4 Methyl                                                                                           |
| LmjF.15.0860 | hypothetical protein, conserved                                                            | -0.82 | 4.20E-01 SDGPRGGVAGPPSGADLFHGSAPQLQLR +4 Methyl x 1                                      | R6 Methyl                                                                                           |
| LmjF.15.0920 | protein phosphatase 2A regulatory subunit, putative                                        | 0.00  | 1.00E+00 QAAVQHVALSGAGGSGAAHWSSNSRSGASR +4 Methyl x 1                                    | R27 Methyl:2H(3)13C(1)                                                                              |
| LmjF.15.0920 | protein phosphatase 2A regulatory subunit, putative                                        | 0.00  | 1.00E+00 QAAVQASASAHSGCYK +3 Methyl x 1                                                  | R12 Methyl                                                                                          |
| LmjF.15.1200 | STE group serine/threonine-protein kinase, putative                                        | 0.00  | 1.00E+00 HVAGGGGGVGGGNASNIHLTAPPNSNEGSVYLMMADEHQGDGI                                     | #N/A                                                                                                |
| LmjF.15.1310 | MGT1 magnesium transporter                                                                 | -0.08 | 8.50E-02 PLLRGGAVVGFGR +3 Methyl x 1 Phos x 1                                            | S1 Phospho, R6 Methyl                                                                               |
| LmjF.15.1380 | nucleolar RNA binding protein, putative                                                    | 0.38  | 3.32E-01 MNTSGFNDRRGR +3 Methyl x 1                                                      | M1 Label:13C(1)2H(3)+Oxidation, R10<br>Methyl:2H(3)13C(1)                                           |
| LmjF.15.1380 | nucleolar RNA binding protein, putative                                                    | 1.16  | 7.76E-01 GRRGGGGFK +2 Methyl x 1                                                         | R3 Methyl:2H(3)13C(1)<br>M1 Label:13C(1)2H(3), R10<br>Methyl:2H(3)13C(1), R13<br>Methyl:2H(3)13C(1) |
| LmjF.15.1380 | nucleolar RNA binding protein, putative                                                    | 2.07  | 1.05E+00 MNTSGFNDRRGGGGGGFK +3 Methyl x 2                                                | #N/A                                                                                                |
| LmjF.16.0660 | hypothetical protein, conserved                                                            | 0.52  | 3.95E-01 CDMTNPSSGARGGTGASSATSSLR +3 Methyl x 1                                          | R6 Methyl:2H(3)13C(1), R10<br>Methyl:2H(3)13C(1), R10                                               |
| LmjF.16.0730 | ubiquitin hydrolase, putative                                                              | 1.16  | 1.00E+00 RSGGGRSGRGGAGATNAPSVPAPSPSETVTEASAPPEPQLEGR                                     | R6 Methyl:2H(3)13C(1), R10<br>Methyl:2H(3)13C(1), R10                                               |
| LmjF.16.0730 | ubiquitin hydrolase, putative                                                              | 0.00  | 1.00E+00 RSGGGRSGRGGAGATNAPSVPAPSPSETVTEASAPPEPQLEGR                                     | R6 Methyl:2H(3)13C(1), R10<br>Methyl:2H(3)13C(1), R10                                               |
| LmjF.16.1230 | hypothetical protein, conserved                                                            | 0.10  | 3.95E-01 GSRPASPSGASVSGRGR +4 Methyl x 1                                                 | R15 Methyl                                                                                          |
| LmjF.16.1230 | hypothetical protein, conserved                                                            | -0.40 | 9.47E-01 GKSRRPASPSGASVSGRGR +3 Methyl x 1                                               | R17 Methyl:2H(3)13C(1)                                                                              |
| LmjF.16.1230 | hypothetical protein, conserved                                                            | 0.12  | 1.09E+00 GSRPASPSGASVSGRGR +3 Methyl x 1                                                 | R15 Methyl                                                                                          |



|              |                                                                                     |       |          |                                                      |                                    |
|--------------|-------------------------------------------------------------------------------------|-------|----------|------------------------------------------------------|------------------------------------|
| LmjF.16.1270 | hypothetical protein, conserved                                                     | -0.15 | 8.42E-01 | VALSQPMPCSPRGGGLGR +3 Methyl x 1                     | M7 Label:13C(1)2H(3), R12          |
| LmjF.16.1340 | hypothetical protein, conserved                                                     | -0.57 | 1.03E+00 | ESQTSARGGANGVSSAR +3 Methyl x 1                      | Methyl:2H(3)13C(1)                 |
| LmjF.17.0380 | Qa-SNARE protein, putative                                                          | -1.31 | 1.00E+00 | APHQPATAGVSSSSSTGRGGGNNVSSAR +4 Methyl x 1           | R8 Methyl:2H(3)13C(1)              |
| LmjF.17.0380 | Qa-SNARE protein, putative                                                          | -0.29 | 8.53E-01 | APHQPATAGVSSSSSTGRGGGNNVSSAR +3 Methyl x 1           | R20 Methyl                         |
| LmjF.17.0510 | hypothetical protein, unknown function                                              | -0.35 | 8.14E-01 | SAALEGPGASCEISAPRGR +3 Methyl x 1                    | R20 Methyl                         |
| LmjF.17.0550 | RNA-binding protein, putative                                                       | 0.36  | 8.57E-02 | GMSRGNNSRAGGNHR +3 Methyl x 2                        | R4 Methyl, R11 Methyl              |
| LmjF.17.0550 | RNA-binding protein, putative                                                       | 4.31  | 1.20E-01 | EGRGMSRGNNNR +3 Methyl x 2                           | R3 Methyl:2H(3)13C(1), M5          |
| LmjF.17.0550 | RNA-binding protein, putative                                                       | 0.00  | 1.00E+00 | GRGGAHLQPCQNFQQPQQYQLHPLPPPPP +5 Methyl x 1          | Methyl:2H(3)13C(1)                 |
| LmjF.18.0390 | hypothetical protein, conserved                                                     | 0.00  | 1.00E+00 | AIAGRGGVVGAPP +3 Methyl x 1                          | R2 Methyl                          |
| LmjF.18.0650 | PA26 p53-induced protein (sestrin), putative                                        | 0.00  | 1.00E+00 | GVHRRGGVSAAGR +3 Methyl x 1                          | #N/A                               |
| LmjF.18.0800 | Ribosomal protein S8, putative                                                      | 0.01  | 4.20E-01 | VYGGATTAFVPGSSSSSSSTASVGDYLRGR +3 Methyl x 1         | R4 Methyl                          |
| LmjF.18.0840 | hypothetical protein, conserved                                                     | -0.71 | 1.03E+00 | GSFGTGRGGASTK +2 Methyl x 1                          | R3 Methyl                          |
| LmjF.18.1240 | pre-RNA processing PIH1/Nop17, putative                                             | 1.12  | 8.42E-01 | DRNSAAAASGRGGGGEAAAR +4 Methyl x 1                   | R7 Methyl                          |
| LmjF.18.1240 | pre-RNA processing PIH1/Nop17, putative                                             | 1.03  | 8.32E-01 | LNSAAAASGRGGGGEAAAR +3 Methyl x 1                    | R13 Methyl:2H(3)13C(1)             |
| LmjF.18.1420 | pumilio protein 2, putative (PUF2)                                                  | 0.51  | 8.63E-01 | DNRPGGVGSSSSGNNNGSGRAGRGR +4 Methyl x 2              | R11 Methyl:2H(3)13C(1)             |
| LmjF.18.1420 | pumilio protein 2, putative (PUF2)                                                  | 10.97 | 1.00E+00 | AGRGGRRNNNNSSNNQHSQDK +3 Methyl x 2                  | R22 Methyl:2H(3)13C(1), R25        |
| LmjF.18.1420 | pumilio protein 2, putative (PUF2)                                                  | 10.97 | 1.00E+00 | DNRPGGVGSSSSGNNNGSGRAGRGR +3 Methyl x 2              | R3 Methyl:2H(3)13C(1), R6          |
| LmjF.18.1420 | pumilio protein 2, putative (PUF2)                                                  | 10.97 | 1.00E+00 | DNRPGGVGSSSSGNNNGSGRAGRGR +4 Methyl x 3              | R22 Methyl:2H(3)13C(1), R25        |
| LmjF.18.1420 | pumilio protein 2, putative (PUF2)                                                  | 0.00  | 1.00E+00 | DNRPGGVGSSSSGNNNGSGRAGRGR +3 Methyl x 1              | Methyl:2H(3)13C(1)                 |
| LmjF.18.1420 | pumilio protein 2, putative (PUF2)                                                  | 0.00  | 1.00E+00 | DNRPGGVGSSSSGNNNGSGRAGRGR +3 Methyl x 2              | R22 Methyl                         |
| LmjF.18.1420 | pumilio protein 2, putative (PUF2)                                                  | 0.00  | 1.00E+00 | GRRGNNNNSSNNQHSQDKNNAMR +4 Methyl x 1                | R3 Methyl                          |
| LmjF.18.1420 | pumilio protein 2, putative (PUF2)                                                  | 0.00  | 1.03E+00 | DNRPGGVGSSSSGNNNGSGRAGRGR +4 Methyl x 1              | R22 Methyl                         |
| LmjF.19.0060 | 40S ribosomal protein S2                                                            | 0.15  | 1.00E+00 | GRGGPEEKVEWPTK +3 Methyl x 1                         | R2 Methyl:2H(3)13C(1)              |
| LmjF.19.0270 | hypothetical protein, conserved                                                     | -0.32 | 1.00E+00 | YGHAPDAVIAIAGRGGSGNGGAAADNSPAPFHTNGCGSN              | R14 Methyl:2H(3)13C(1)             |
| LmjF.19.0270 | hypothetical protein, conserved                                                     | 0.00  | 1.00E+00 | KYGHAPDAVIAIAGRGGSGNGGAAADNSPAPFHTNGCGSN             | R15 Methyl:2H(3)13C(1)             |
| LmjF.19.0380 | hypothetical protein, conserved                                                     | 10.97 | 1.00E+00 | RVPDSGAMASSGAGRAGRGR +4 Methyl x 3                   | R17 Methyl, R21 Methyl, R23 Methyl |
| LmjF.19.0430 | hypothetical protein, conserved                                                     | -0.92 | 5.59E-02 | DGRGGAAPLCSSSSSGGK +3 Methyl x 1                     | R3 Methyl:2H(3)13C(1)              |
| LmjF.19.0800 | ABC transport system ATP-binding protein, putative                                  | -1.34 | 5.82E-02 | MTRGGLTDAVVKDSR +3 Methyl x 1                        | R3 Methyl                          |
| LmjF.19.1020 | tRNA pseudouridine synthase A-like protein                                          | -2.13 | 4.55E-01 | AAASSTGRRGPPVSSAYSAEHLTSHLGR +5 Methyl x 1           | R10 Methyl                         |
| LmjF.19.1020 | tRNA pseudouridine synthase A-like protein                                          | 0.32  | 8.22E-01 | AAASSTGRRGPPVSSAYSAEHLTSHLGR +4 Methyl x 1           | R10 Methyl                         |
| LmjF.19.1090 | hypothetical protein, unknown function                                              | -0.60 | 1.08E+00 | TARGRGAAGGAAR +3 Methyl x 2                          | R3 Methyl:2H(3)13C(1), R5          |
| LmjF.19.1130 | hypothetical protein, conserved                                                     | -0.64 | 4.81E-01 | ALLFEQVAQQLVLSAR +2 Methyl x 1                       | Phos x 1                           |
| LmjF.20.0360 | Protein of unknown function (DUF2946), putative                                     | -0.50 | 9.44E-01 | TLRGGP +2 Methyl x 1                                 | #N/A                               |
| LmjF.20.1080 | WD40 repeat-containing protein                                                      | -1.18 | 9.25E-01 | LTGSSDMVNLGRGWLR +3 Methyl x 1                       | M7 Label:13C(1)2H(3), R13          |
| LmjF.20.1240 | Raptor N-terminal CASPase like domain containing protein, putative                  | -0.20 | 8.61E-01 | TGARGTSSATTR +2 Methyl x 1                           | R4 Methyl                          |
| LmjF.21.0270 | STE group serine/threonine-protein kinase, putative                                 | 0.02  | 4.09E-01 | EVGRGGSAVLR +3 Methyl x 1                            | #N/A                               |
| LmjF.21.0270 | STE group serine/threonine-protein kinase, putative                                 | 0.45  | 7.73E-02 | SLTVVNPGRGGGELNSTYDK +3 Methyl x 1                   | R12 Methyl                         |
| LmjF.21.0490 | DnaI protein, putative                                                              | 0.96  | 1.00E+00 | GRQAHAEEDEFVDDDDQEQYFR +4 Methyl x 1                 | Phos x 1                           |
| LmjF.21.0490 | DnaI protein, putative                                                              | 0.32  | 1.00E+00 | GRQAHAEEDEFVDDDDQEQYFR +3 Methyl x 1                 | Phos x 1                           |
| LmjF.21.1030 | hypothetical protein, conserved                                                     | -0.70 | 8.60E-01 | GAGGSRPPFAVDDDANYSDDGGRRGR +4 Methyl x 1             | R27 Methyl:2H(3)13C(1)             |
| LmjF.21.1030 | hypothetical protein, conserved                                                     | 0.00  | 1.00E+00 | GAGGSRPPFAVDDDANYSDDGGRRGR +3 Methyl x 1             | R27 Methyl:2H(3)13C(1)             |
| LmjF.21.1850 | hypothetical protein, conserved                                                     | 0.46  | 1.18E-01 | GRGGAEPPEER +2 Methyl x 1                            | R2 Methyl:2H(3)13C(1)              |
| LmjF.22.1320 | hypothetical protein, unknown function                                              | -1.09 | 1.00E+00 | GGNALLSSGEPVGRGSLVWGGGGDSSGALAPLR +3 Methyl x 1      | R16 Methyl:2H(3)13C(1)             |
| LmjF.23.0080 | hypothetical protein, conserved                                                     | -0.59 | 1.09E+00 | AVSAQVQAR +2 Methyl x 1                              | R9 Methyl                          |
| LmjF.23.0090 | Domain of unknown function (DUF1767), putative (TDRD3)                              | 5.72  | 4.57E-01 | NGGGGRRQAQGDNYEGR +3 Methyl x 1                      | R7 Methyl:2H(3)13C(1)              |
| LmjF.23.0090 | Domain of unknown function (DUF1767), putative (TDRD3)                              | 0.02  | 8.95E-01 | NGGGGRRQAQGDNYEGR +2 Methyl x 1                      | R7 Methyl:2H(3)13C(1)              |
| LmjF.23.1010 | hypothetical protein, conserved                                                     | 0.60  | 8.13E-01 | QHQRRGGGKPEVSPAPNSGGSSNNR +4 Methyl x 1              | R5 Methyl:2H(3)13C(1), M6          |
| LmjF.23.1290 | hypothetical protein, unknown function                                              | -0.23 | 4.74E-01 | RGGGMASEAFR +2 Methyl x 1                            | Label:13C(1)2H(3)                  |
| LmjF.23.1290 | hypothetical protein, unknown function                                              | 0.35  | 8.75E-01 | RGGGMASEAFR +3 Methyl x 1                            | R1 Methyl:2H(3)13C(1), M6          |
| LmjF.23.1620 | hypothetical protein                                                                | -1.95 | 1.00E+00 | DQGRPRGGGSSAAATFGHGSVTDYDQVTSAAELR +5 Methyl x 1     | Label:13C(1)2H(3)                  |
| LmjF.23.1620 | hypothetical protein                                                                | 0.00  | 1.00E+00 | DQGRPRGGGSSAAATFGHGSVTDYDQVTSAAELR +4 Methyl x 1     | R4 Methyl                          |
| LmjF.23.1730 | RING-H2 zinc finger, putative                                                       | -0.78 | 1.07E+00 | SRGDDLHQQGR +3 Methyl x 1                            | R2 Methyl                          |
| LmjF.23.1730 | RING-H2 zinc finger, putative                                                       | 10.97 | 1.00E+00 | GGDGLHQQGRSGQR +3 Methyl x 1                         | R10 Methyl:2H(3)13C(1)             |
| LmjF.23.1730 | RING-H2 zinc finger, putative                                                       | 0.00  | 1.00E+00 | SRGDDLHQQGR +4 Methyl x 1                            | R2 Methyl                          |
| LmjF.24.1070 | hypothetical protein, conserved                                                     | -0.85 | 3.46E-01 | SAAGSPTAAGAATSRGGGPGKPPR +3 Methyl x 1               | #N/A                               |
| LmjF.24.1070 | hypothetical protein, conserved                                                     | -0.52 | 1.02E-01 | SAAGSPTAAGAATSRGGGPGK +3 Methyl x 1                  | R15 Methyl                         |
| LmjF.24.1470 | hypothetical protein, conserved                                                     | -3.13 | 8.25E-01 | GGGGRRGALLMNESSLQR +3 Methyl x 1                     | Phos x 1                           |
| LmjF.24.1470 | hypothetical protein, conserved                                                     | -1.19 | 1.00E+00 | TEFVDSYRGGGRRGALLMNESSLQR +4 Methyl x 1              | R15 Methyl                         |
| LmjF.24.1470 | hypothetical protein, conserved                                                     | -0.34 | 8.04E-01 | GGGGRRGALLMNESSLQR +3 Methyl x 1                     | R6 Methyl:2H(3)13C(1), M13         |
| LmjF.24.1580 | hypothetical protein, conserved                                                     | -0.03 | 2.78E-01 | HGAQPQQGSRGVAAGAAQAR +3 Methyl x 1                   | Label:13C(1)2H(3)                  |
| LmjF.24.1580 | hypothetical protein, conserved                                                     | 0.12  | 3.48E-01 | HGAQPQQGSRGVAAGAAQAR +4 Methyl x 1                   | R11 Methyl                         |
| LmjF.24.1880 | cyclin 11, putative                                                                 | 0.34  | 1.10E+00 | SGVRGGSSGGVR +2 Methyl x 1                           | R1 Methyl                          |
| LmjF.25.0290 | RNA-binding protein, putative                                                       | -0.12 | 4.32E-01 | GRGVGCMNPPAPISDGLAIPVPSAR +3 Methyl x 1              | R4 Methyl:2H(3)13C(1), M7          |
| LmjF.25.0290 | RNA-binding protein, putative                                                       | 10.97 | 1.00E+00 | SVARPPPPPPPIRGR +3 Methyl x 2                        | Label:13C(1)2H(3)                  |
| LmjF.25.0290 | RNA-binding protein, putative                                                       | 10.97 | 1.00E+00 | SVARPPPPPPPIRGRGVCMTNPPAPISDGLAIPVPSAR +5 Methyl x 1 | R14 Methyl, R16 Methyl             |
| LmjF.25.0290 | RNA-binding protein, putative                                                       | 1.25  | 1.00E+00 | SVARPPPPPPPIRGRGVCMTNPPAPISDGLAIPVPSAR +5 Methyl x 1 | #N/A                               |
| LmjF.25.0290 | RNA-binding protein, putative                                                       | 0.00  | 1.00E+00 | AEQVFPSPPTGPIPLR +2 Methyl x 1                       | Phos x 1                           |
| LmjF.25.0290 | RNA-binding protein, putative                                                       | -4.36 | 1.00E+00 | AEQVFPSPPTGPIPLR +2 Methyl x 1                       | R18 Methyl:2H(3)13C(1)             |
| LmjF.25.0290 | RNA-binding protein, putative                                                       | 0.13  | 1.03E+00 | AEQVFPSPPTGPIPLRGR +3 Methyl x 1                     | R20 Methyl                         |
| LmjF.25.0540 | hypothetical protein SCD6.10 (SCD6)                                                 | 0.83  | 1.19E-01 | ADTETFGPEMVMRGRFR +3 Methyl x 1                      | R15 Methyl                         |
| LmjF.25.0540 | hypothetical protein SCD6.10 (SCD6)                                                 | -0.70 | 1.36E-01 | DPAIVEVHAPARGRGR +3 Methyl x 3                       | R14 Methyl:2H(3)13C(1), R17        |
| LmjF.25.0540 | hypothetical protein SCD6.10 (SCD6)                                                 | 0.32  | 2.71E-01 | KADTFEGPEMVMRGR +3 Methyl x 1                        | Methyl:2H(3)13C(1)                 |
| LmjF.25.0540 | hypothetical protein SCD6.10 (SCD6)                                                 | -0.09 | 3.88E-01 | DSSSPQARDPAIVEVHAPARGRGR +4 Methyl x 2               | Phos x 1                           |
| LmjF.25.0540 | hypothetical protein SCD6.10 (SCD6)                                                 | -0.98 | 4.39E-01 | DSSSPQARDPAIVEVHAPARGRGR +4 Methyl x 3               | R20 Methyl, R22 Methyl, R25 Methyl |
| LmjF.25.0540 | hypothetical protein SCD6.10 (SCD6)                                                 | 0.15  | 4.63E-01 | DSSSPQARDPAIVEVHAPARGRGR +4 Methyl x 2               | R20 Methyl, R22 Methyl, R25 Methyl |
| LmjF.25.0540 | hypothetical protein SCD6.10 (SCD6)                                                 | 1.36  | 8.22E-01 | DPAIVEVHAPARGRGR +3 Methyl x 2                       | R14 Methyl:2H(3)13C(1), R17        |
| LmjF.25.0540 | hypothetical protein SCD6.10 (SCD6)                                                 | -1.32 | 8.32E-01 | GGRAAAAPASATASAAATR +3 Methyl x 1                    | Methyl:2H(3)13C(1)                 |
| LmjF.25.0540 | hypothetical protein SCD6.10 (SCD6)                                                 | -4.77 | 8.35E-01 | NHRGGYGR +2 Methyl x 1                               | #N/A                               |
| LmjF.25.0540 | hypothetical protein SCD6.10 (SCD6)                                                 | 1.13  | 8.43E-01 | KADTFEGPEMVMRGRFR +4 Methyl x 1                      | R3 Methyl:2H(3)13C(1)              |
| LmjF.25.0540 | hypothetical protein SCD6.10 (SCD6)                                                 | 10.97 | 1.00E+00 | DPAIVEVHAPARGRGGRAAAAAPASATASAAATR +5 Methyl x 1     | M11 Label:13C(1)2H(3), M15         |
| LmjF.25.0540 | hypothetical protein SCD6.10 (SCD6)                                                 | -0.49 | 1.03E+00 | SYDEAQPYSRGGGGR +3 Methyl x 1                        | Label:13C(1)2H(3), R16             |
| LmjF.25.0540 | hypothetical protein SCD6.10 (SCD6)                                                 | -1.18 | 1.07E+00 | GGYGRGGSGNYR +2 Methyl x 1                           | Label:13C(1)2H(3), R16             |
| LmjF.25.0540 | hypothetical protein SCD6.10 (SCD6)                                                 | -1.04 | 1.09E+00 | GGYGRGGSGNYR +3 Methyl x 1                           | Methyl:2H(3)13C(1)                 |
| LmjF.25.1080 | hypothetical protein, conserved                                                     | -1.63 | 8.23E-01 | GGSRGGGASCCER +3 Methyl x 2                          | R4 Methyl, R7 Methyl               |
| LmjF.25.1430 | Putative intraflagellar transport protein A1                                        | 0.00  | 1.00E+00 | RRGGGLSLPMSDEDNGENAPR +3 Methyl x 1                  | Phos x 1                           |
| LmjF.25.1540 | mitochondrial RNA binding complex 1 subunit, putative                               | 1.26  | 4.56E-01 | AIAAQSVRGGGVLVESAPATSFAFR +3 Methyl x 1              | #N/A                               |
| LmjF.25.1540 | mitochondrial RNA binding complex 1 subunit, putative                               | 4.03  | 1.00E+00 | RGRSYADAVSDGNMNR +3 Methyl x 2                       | R9 Methyl                          |
| LmjF.25.1540 | mitochondrial RNA binding complex 1 subunit, putative                               | -0.38 | 1.00E+00 | AIAAQSVRGGGVLVESAPATSFAFR +4 Methyl x 1              | R1 Methyl, R3 Methyl               |
| LmjF.25.1740 | mitochondrial RNA binding complex 1 subunit, putative                               | -0.11 | 3.17E-01 | HGVGNNGSRGGDGAPR +2 Methyl x 1                       | R9 Methyl                          |
| LmjF.25.1740 | mitochondrial RNA binding complex 1 subunit, putative                               | -1.10 | 3.43E-01 | HGVGNNGSRGGDGAPR +3 Methyl x 1                       | R10 Methyl                         |
| LmjF.25.1740 | mitochondrial RNA binding complex 1 subunit, putative                               | 0.04  | 4.03E-01 | RGGPMGR +2 Methyl x 1                                | R1 Methyl                          |
| LmjF.25.1740 | mitochondrial RNA binding complex 1 subunit, putative                               | -0.06 | 1.03E+00 | HGVGNNGSRGGDGAPR +4 Methyl x 1                       | R10 Methyl                         |
| LmjF.25.1830 | Histone RNA hairpin-binding protein RNA-binding domain containing protein, putative | 0.53  | 1.00E+00 | MRSNVSSGAR +2 Methyl x 1                             | M1 Label:13C(1)2H(3), R2           |
| LmjF.25.2000 | hypothetical protein, conserved                                                     | -0.50 | 8.26E-01 | GRGGCAGGAGTLHWQR +3 Methyl x 1                       | Methyl:2H(3)13C(1)                 |
| LmjF.25.2070 | Rieske [2Fe-2S] domain containing protein, putative                                 | -0.47 | 6.28E-01 | ERPMSPVLDGGGLR +3 Methyl x 1                         | R2 Methyl:2H(3)13C(1)              |
| LmjF.26.0920 | hypothetical protein, conserved                                                     | -1.56 | 1.00E+00 | TGAALDCAOPLNPLSPSDFELRGR +3 Methyl x 1               | M4 Label:13C(1)2H(3), R13          |
| LmjF.26.1110 | TROVE domain containing protein, putative                                           | 0.47  | 8.54E-01 | RGASVAVSAPPAQATTFVEAPR +3 Methyl x 1                 | Methyl:2H(3)13C(1)                 |

|              |                                                                            |       |                                                          |                             |
|--------------|----------------------------------------------------------------------------|-------|----------------------------------------------------------|-----------------------------|
| LmjF.26.1530 | RNA recognition motif. (a.k.a. RRM, RBD, or RNP domain), putative          | -0.16 | 5.14E-01 SHSNQYSQDSGVSSGGAGMQRGMR +4 Methyl x 1          | M20 Label:13C(1)2H(3), M24  |
| LmjF.26.1820 | hypothetical protein, conserved                                            | -0.54 | 1.03E+00 SSRGGTFLVQSEEDAR +2 Methyl x 1                  | Label:13C(1)2H(3), R25      |
| LmjF.26.1820 | hypothetical protein, conserved                                            | 0.12  | 1.36E-01 SSRGGTFLVQSEEDAR +3 Methyl x 1                  | Methyl:2H(3)13C(1)          |
| LmjF.26.2120 | hypothetical protein, conserved                                            | 2.12  | 5.86E-01 GASSPLLPPEFVGRGVR +3 Methyl x 1                 | R3 Methyl                   |
| LmjF.26.2170 | Cornifin (SPRR) family, putative                                           | 0.52  | 8.74E-01 SCRGGGSCFAAHTTSTR +3 Methyl x 1                 | R20 Methyl                  |
| LmjF.26.2380 | Fibronectin type III domain containing protein, putative                   | -0.52 | 4.11E-01 RGGASTSPAATLTEMANR +3 Methyl x 1                | R3 Methyl                   |
| LmjF.26.2420 | hypothetical protein, conserved                                            | -0.12 | 5.30E-01 RGGGTPLGR +2 Methyl x 1                         | R1 Methyl, T5 Phospho       |
| LmjF.27.0130 | WW domain/Zinc finger C-x8-C-x5-C-x3-H type (and similar), putative (ZFP3) | 0.87  | 7.48E-02 TTHWSIPPTAYEPYNNRGRGAGYR +5 Methyl x 2          | #N/A                        |
| LmjF.27.0130 | WW domain/Zinc finger C-x8-C-x5-C-x3-H type (and similar), putative (ZFP3) | -7.63 | 1.00E+00 TTHWSIPPTAYEPYNNRGRG +4 Methyl x 1              | R19 Methyl:2H(3)13C(1), R21 |
| LmjF.27.0270 | hypothetical protein, conserved                                            | -1.16 | 1.03E+00 TKVPGNNAQDQPSNEVASDLDNHTALRGK +4 Methyl x 1 Phi | Methyl:2H(3)13C(1)          |
| LmjF.27.0700 | hypothetical protein, conserved                                            | -1.35 | 8.55E-01 RGGGGAASQGGSDVDDMSQTASGDVR +3 Methyl x 1        | S19 Phospho, R29 Methyl     |
| LmjF.27.1300 | KH domain containing protein, putative                                     | -2.35 | 1.17E-01 GGGRGAGAPGNDDAAR +3 Methyl x 1                  | R1 Methyl:2H(3)13C(1), M17  |
| LmjF.27.1300 | KH domain containing protein, putative                                     | -1.53 | 3.34E-01 GGNDEGRGGYVPR +3 Methyl x 1                     | Label:13C(1)2H(3)           |
| LmjF.27.1300 | KH domain containing protein, putative                                     | 0.01  | 6.82E-01 RAGPPAGQHPHPR +3 Methyl x 1                     | R4 Methyl:2H(3)13C(1)       |
| LmjF.27.1300 | KH domain containing protein, putative                                     | 0.07  | 1.01E+00 GGNDEGRGGYVPR +2 Methyl x 1                     | R7 Methyl                   |
| LmjF.27.2170 | hypothetical protein, conserved                                            | -0.62 | 1.21E-01 SVQLSSSEVDTRGGTGTR +3 Methyl x 1                | R1 Methyl                   |
| LmjF.27.2170 | hypothetical protein, conserved                                            | 0.38  | 8.93E-01 RGGTGSAGORPVTPQSEIENR +4 Methyl x 1             | R7 Methyl                   |
| LmjF.28.0825 | RNA binding protein rbp16, putative (RBP16)                                | 1.24  | 9.75E-01 AENVTPAGGKLPSPRPPEGSPGR +4 Methyl x 1           | R13 Methyl:2H(3)13C(1)      |
| LmjF.28.0825 | RNA binding protein rbp16, putative (RBP16)                                | 10.97 | 1.00E+00 VYSWMSGRGFGIEDNADKK +3 Methyl x 1               | R11 Methyl:2H(3)13C(1)      |
| LmjF.28.0825 | RNA binding protein rbp16, putative (RBP16)                                | 10.81 | 1.00E+00 VYSWMSGRGFGIEDNADKK +4 Methyl x 1               | R26 Methyl                  |
| LmjF.28.0825 | RNA binding protein rbp16, putative (RBP16)                                | 10.81 | 1.00E+00 VYSWMSGRGFGIEDNADKK +3 Methyl x 1               | R8 Methyl                   |
| LmjF.28.0825 | RNA binding protein rbp16, putative (RBP16)                                | 0.41  | 1.00E+00 VYSWMSGRGFGIEDNADKK +3 Methyl x 1               | R8 Methyl                   |
| LmjF.28.1060 | hypothetical protein, conserved                                            | 0.00  | 1.07E+00 VYSWMSGR +2 Methyl x 1                          | #N/A                        |
| LmjF.28.1080 | hypothetical protein, conserved                                            | -1.50 | 1.00E+00 RGQAATPTGNR +2 Methyl x 1                       | #N/A                        |
| LmjF.28.2780 | heat-shock protein hsp70, putative                                         | -0.44 | 1.36E-01 EVADTQDVEVPAASRRGR +3 Methyl x 1                | R1 Methyl:2H(3)13C(1)       |
| LmjF.29.0290 | zinc-finger of a CZHC-type, putative                                       | -0.51 | 1.07E+00 TTPSYVAFDSE +2 Methyl x 1                       | R19 Methyl                  |
| LmjF.29.0290 | zinc-finger of a CZHC-type, putative                                       | -0.40 | 1.04E+00 QGRGGISAVNPVSTAAGR +2 Methyl x 1                | R13 Methyl                  |
| LmjF.29.0370 | protein kinase-like protein                                                | -0.63 | 7.74E-01 QGRGGISAVNPVSTAAGR +3 Methyl x 1                | R3 Methyl                   |
| LmjF.29.0370 | protein kinase-like protein                                                | 0.00  | 1.00E+00 SPPLSNLNEANGTGRGFSFPCPSPLK +3 Methyl x 1        | R3 Methyl                   |
| LmjF.29.0680 | Triple RNA binding domain protein 3 (TRRM3)                                | -0.53 | 1.00E+00 SPPLSNLNEANGTGRGFSFPCPSPLK +3 Methyl x 1        | R15 Methyl:2H(3)13C(1)      |
| LmjF.29.0680 | Triple RNA binding domain protein 3 (TRRM3)                                | -0.43 | 1.55E-01 HAGGNGHWRGGAATAA +4 Methyl x 1                  | R15 Methyl:2H(3)13C(1)      |
| LmjF.29.0680 | Triple RNA binding domain protein 3 (TRRM3)                                | -0.43 | 3.16E-01 HAGGNGHWRGGAATAA +3 Methyl x 1                  | R9 Methyl                   |
| LmjF.29.0680 | Triple RNA binding domain protein 3 (TRRM3)                                | 0.00  | 1.00E+00 GGASASSAFSSR +2 Methyl x 1                      | R9 Methyl                   |
| LmjF.29.0680 | Triple RNA binding domain protein 3 (TRRM3)                                | -0.15 | 1.00E+00 RGHDSASHHDEEHDDEAGLDSNAAK +3 Methyl x 1 Phos    | #N/A                        |
| LmjF.29.0770 | hypothetical protein, conserved                                            | 0.14  | 1.04E+00 RGHDSASHHDEEHDDEAGLDSNAAK +4 Methyl x 1 Phos    | R1 Methyl, S18 Phospho      |
| LmjF.29.1090 | ribosomal protein L1a, putative                                            | -0.13 | 8.43E-01 ATDSVQGLLR +2 Methyl x 1                        | R11 Methyl:2H(3)13C(1)      |
| LmjF.29.1090 | ribosomal protein L1a, putative                                            | -1.94 | 8.52E-01 ISGGTSTSGAGAFGNMCRGR +3 Methyl x 1              | M17 Oxidation, R19 Methyl   |
| LmjF.29.1110 | hypothetical protein, conserved                                            | 10.97 | 1.04E+00 ISGGTSTSGAGAFGNMCR +2 Methyl x 1                | M17 Label:13C(1)2H(3), R19  |
| LmjF.29.1230 | COPII coat assembly protein sec16, putative                                | -0.35 | 1.00E+00 AAGRGDAAGLSQHASFGDVL +4 Methyl x 1              | Methyl:2H(3)13C(1)          |
| LmjF.29.2330 | hypothetical protein, conserved                                            | 0.03  | 1.16E-01 VDLTTSRGR +3 Methyl x 1                         | R4 Methyl:2H(3)13C(1)       |
| LmjF.30.0090 | hypothetical protein, conserved                                            | 1.19  | 4.99E-01 VSPPTGPRGSVNLDDLH +3 Methyl x 1 Phos x 1        | #N/A                        |
| LmjF.30.0260 | mitochondrial RNA binding protein 1, putative                              | -3.64 | 9.28E-01 TRIEGRGRTQVSR +3 Methyl x 1                     | S3 Phospho, R10 Methyl      |
| LmjF.30.0320 | Sad1 / UNC-like C-terminal, putative                                       | 10.97 | 6.16E-01 QQRGGAGCVGAASNSHAAEGDVAVPVR +4 Methyl x 1       | R8 Methyl                   |
| LmjF.30.0760 | hypothetical protein, conserved                                            | -2.97 | 1.00E+00 YNIRGGSGVAVGGNGPPLWPR +3 Methyl x 1             | #N/A                        |
| LmjF.30.0760 | hypothetical protein, conserved                                            | 4.25  | 3.18E-01 RGGSGDVAVAGGNEGR +2 Methyl x 1                  | R6 Methyl:2H(3)13C(1)       |
| LmjF.30.0760 | hypothetical protein, conserved                                            | -0.27 | 4.60E-01 RGGSGDVAVAGGNEGRGR +3 Methyl x 2                | R1 Methyl:2H(3)13C(1), R17  |
| LmjF.30.0760 | hypothetical protein, conserved                                            | 0.00  | 1.02E+00 GRGGGGHEDAMEK +3 Methyl x 1                     | Methyl:2H(3)13C(1)          |
| LmjF.30.0760 | hypothetical protein, conserved                                            | 0.00  | 1.00E+00 GRGGGGHEDAMEK +2 Methyl x 1                     | R2 Methyl                   |
| LmjF.30.0760 | hypothetical protein, conserved                                            | 0.00  | 1.00E+00 RGGPPT +2 Methyl x 1                            | R2 Methyl                   |
| LmjF.30.0780 | mitochondrial oligo_U binding protein TBRGG1, putative                     | -0.39 | 1.02E+00 GGYEGRGGPR +2 Methyl x 1                        | #N/A                        |
| LmjF.30.0900 | hypothetical protein, conserved                                            | -1.05 | 1.23E-01 RGNIRPGRSAPSQAQASVVDQPR +4 Methyl x 1           | R6 Methyl:2H(3)13C(1)       |
| LmjF.30.1810 | Zeta toxin, putative                                                       | -0.96 | 8.59E-01 AGTSSSSTAGSRRGNAGGNYAHTSK +4 Methyl x 1         | #N/A                        |
| LmjF.30.1810 | Zeta toxin, putative                                                       | 0.00  | 1.00E+00 AGTSSSSTAGSRRGNAGGNYAHTSK +3 Methyl x 1         | R14 Methyl:2H(3)13C(1)      |
| LmjF.30.2710 | hypothetical protein, conserved                                            | -0.32 | 8.55E-01 SSSGAGRGASGGPGGSDGQR +3 Methyl x 1              | R14 Methyl:2H(3)13C(1)      |
| LmjF.30.2710 | hypothetical protein, conserved                                            | 0.00  | 1.00E+00 SSSGAGRGASGGPGGSDGQR +3 Methyl x 1 Phos x 1     | S2 Phospho, R8 Methyl       |
| LmjF.31.0080 | hypothetical protein, conserved (ZC3H34)                                   | -1.99 | 9.73E-01 GRGGWYPPSAGSGYNNMR +3 Methyl x 1                | R8 Methyl                   |
| LmjF.31.0080 | hypothetical protein, conserved (ZC3H34)                                   | 0.00  | 1.00E+00 HMDGIPPHAYQPPVYQPPVYPMGNPMYVNPQGYPPAMF          | R45 Methyl                  |
| LmjF.31.0560 | mevalonate kinase, putative                                                | -0.68 | 8.51E-01 LSGTRGGIYALAASSDQR +3 Methyl x 1                | R6 Methyl:2H(3)13C(1)       |
| LmjF.31.1050 | hypothetical protein, unknown function                                     | -2.19 | 9.29E-01 SHAVPYEGTVHPSSRGR +4 Methyl x 1                 | #N/A                        |
| LmjF.31.1260 | Microtubule-binding stalk of dynein motor, putative                        | -0.69 | 4.76E-01 VSPAPSPRGSAGK +2 Methyl x 1                     | R8 Methyl                   |
| LmjF.31.1380 | hypothetical protein, unknown function                                     | -0.38 | 6.28E-01 TARGGAACQLQR +3 Methyl x 1                      | R3 Methyl:2H(3)13C(1)       |
| LmjF.31.1750 | nucleosome assembly protein-like protein                                   | -2.78 | 1.02E+00 GRRGGAASQPPQEQEK +3 Methyl x 1                  | R3 Methyl:2H(3)13C(1)       |
| LmjF.31.1750 | nucleosome assembly protein-like protein                                   | -1.92 | 4.37E-01 QRGGATPGGR +2 Methyl x 1                        | R2 Methyl                   |
| LmjF.31.2360 | hypothetical protein, conserved                                            | 0.95  | 6.36E-01 LQRGGYQALQGR +3 Methyl x 1                      | R3 Methyl                   |
| LmjF.31.2590 | TerD domain containing protein, putative                                   | 0.00  | 1.00E+00 RGGREVTQATR +3 Methyl x 1                       | R1 Methyl                   |
| LmjF.32.0400 | ATP-dependent RNA helicase HEL67 (DDX3)                                    | 0.34  | 1.07E+00 LATPPYEGVQLPGAASAEER +4 Methyl x 1 Phos x 1     | #N/A                        |
| LmjF.32.0400 | ATP-dependent RNA helicase HEL67 (DDX3)                                    | -0.16 | 5.30E-01 NGGGGFRGGFGGGGGR +3 Methyl x 1                  | R8 Methyl:2H(3)13C(1)       |
| LmjF.32.0400 | ATP-dependent RNA helicase HEL67 (DDX3)                                    | 0.02  | 8.53E-01 QYGGNRFNDQAQTYGGGFNR +3 Methyl x 1              | R7 Methyl                   |
| LmjF.32.0400 | ATP-dependent RNA helicase HEL67 (DDX3)                                    | 0.32  | 1.00E+00 QYGGNRFNDQAQTYGGGFNR +2 Methyl x 1              | R7 Methyl                   |
| LmjF.32.0400 | ATP-dependent RNA helicase HEL67 (DDX3)                                    | -0.74 | 1.03E+00 SGFGGFRGGFGGGGGRGVR +3 Methyl x 1               | R19 Methyl                  |
| LmjF.32.0400 | ATP-dependent RNA helicase HEL67 (DDX3)                                    | 0.07  | 1.05E+00 NGGGGFRGGFGGGGGR +2 Methyl x 1                  | R8 Methyl:2H(3)13C(1)       |
| LmjF.32.0620 | hypothetical protein, conserved                                            | -0.31 | 2.77E-01 GPSVERGAGAR +3 Methyl x 1                       | #N/A                        |
| LmjF.32.0620 | hypothetical protein, conserved                                            | 6.24  | 1.00E+00 GGMGRAGSR +2 Methyl x 1                         | R5 Methyl                   |
| LmjF.32.0840 | hypothetical protein, conserved (DRBD18)                                   | 0.51  | 1.00E+00 GRGGRRGCLDTMGMAQYMPFPQVGGMAR +4 Methyl x 2      | R2 Methyl:2H(3)13C(1), M13  |
| LmjF.32.0840 | hypothetical protein, conserved (DRBD18)                                   | -7.25 | 1.00E+00 GRGGRRGCLDTMGMAQYMPFPQVGGMAR +3 Methyl x 1      | Label:13C(1)2H(3), M15      |
| LmjF.32.0850 | polypyrimidine tract-binding protein, putative (DRBD4)                     | 0.66  | 1.18E-01 GGGIRGGSGTGLGAATGFSFPFSGTTPARGGASVGR +4 Methyl  | Label:13C(1)2H(3), M20      |
| LmjF.32.0850 | polypyrimidine tract-binding protein, putative (DRBD4)                     | -0.42 | 8.29E-01 GGGIRGGSGTGLGAATGFSFPFSGTTPAR +3 Methyl x 1     | Label:13C(1)2H(3), M28      |
| LmjF.32.0880 | 60S ribosomal protein L18a, putative                                       | 0.74  | 7.75E-01 HYQVGR +2 Methyl x 1                            | Label:13C(1)2H(3)           |
| LmjF.32.1130 | hypothetical protein, conserved                                            | -0.66 | 9.70E-02 QSAPRGGGSAVAR +3 Methyl x 1                     | R3 Methyl                   |
| LmjF.32.1650 | hypothetical protein, conserved                                            | -0.89 | 2.88E-01 SIRAGGPGSAGK +3 Methyl x 1                      | R6 Methyl:2H(3)13C(1)       |
| LmjF.32.1800 | hypothetical protein, conserved                                            | -0.71 | 7.77E-01 GGGAGRGGQGR +2 Methyl x 1                       | R6 Methyl:2H(3)13C(1)       |
| LmjF.32.1970 | ribosome biogenesis protein TSR3, putative                                 | -0.18 | 8.36E-01 GRGGSGGVCTSGFHNEPPAHPCSVPLAMWDFEQCDPNACS        | #N/A                        |
| LmjF.32.2130 | RNA recognition motif. (a.k.a. RRM, RBD, or RNP domain), putative          | 0.01  | 2.93E-01 EPPYLSNRPPYGGPGMRRGGMR +4 Methyl x 1            | #N/A                        |
| LmjF.32.2490 | hypothetical protein, conserved                                            | -0.14 | 8.61E-01 GYQYAGRGAK +2 Methyl x 1                        | R8 Methyl                   |
| LmjF.32.2520 | hypothetical protein, unknown function                                     | 0.74  | 8.24E-01 GHPSYGERGGR +3 Methyl x 1                       | R9 Methyl                   |
| LmjF.32.2520 | hypothetical protein, unknown function                                     | 1.31  | 1.00E+00 SAPPRGGYGAAPMSLSPAPALMSK +3 Methyl x 1          | #N/A                        |
| LmjF.32.2580 | hypothetical protein, conserved                                            | -0.82 | 1.05E+00 MHEEDQSGRRGGR +3 Methyl x 1                     | M1 Label:13C(1)2H(3), R11   |
| LmjF.32.2830 | hypothetical protein, conserved                                            | 0.71  | 8.45E-01 QNVTSSGRGSAVAQDGDADVGEESTAPR +3 Methyl x 1 Phos | Methyl:2H(3)13C(1)          |
| LmjF.32.2830 | hypothetical protein, conserved                                            | 0.00  | 1.00E+00 QNVTSSGRGSAVAQDGDADVGEESTAPR +3 Methyl x 1      | R8 Methyl:2H(3)13C(1)       |
| LmjF.32.3090 | hypothetical protein, conserved                                            | -0.31 | 1.06E+00 SPALVTPSSASRGR +3 Methyl x 1                    | R14 Methyl                  |
| LmjF.32.3090 | hypothetical protein, conserved                                            | 0.00  | 1.00E+00 AELPASGTSAPLGAARRGK +3 Methyl x 1               | R19 Methyl:2H(3)13C(1)      |
| LmjF.32.3690 | hypothetical protein, conserved                                            | 6.81  | 8.57E-01 RGEVSGAGAAEGR +2 Methyl x 1                     | R1 Methyl:2H(3)13C(1)       |
| LmjF.33.0260 | RGG-containing protein 2, putative (RGG2)                                  | -0.18 | 4.53E-01 DSSDHWGGRRGGHSGWGGDQKADPTGDR +4 Methyl x :      | R10 Methyl:2H(3)13C(1)      |
| LmjF.33.0260 | RGG-containing protein 2, putative (RGG2)                                  | -1.16 | 8.61E-01 RRRGGSGGVWGPAAEDAWNAAPPSPQPPVR +4 Methyl        | #N/A                        |
| LmjF.33.0260 | RGG-containing protein 2, putative (RGG2)                                  | 0.21  | 9.74E-01 DSSDHWGGRRGGHSGWGGDQKADPTGDR +3 Methyl x :      | R10 Methyl:2H(3)13C(1)      |
| LmjF.33.0260 | RGG-containing protein 2, putative (RGG2)                                  | -2.14 | 1.00E+00 GRGGSGGVWGPAAEDAWNAAPPSPQPPVR +3 Methyl x       | R2 Methyl:2H(3)13C(1)       |
| LmjF.33.0940 | hypothetical protein, conserved                                            | -1.17 | 1.00E+00 QASRRGGNVAAMSLTGSATNLR +3 Methyl x 1            | R5 Methyl:2H(3)13C(1), M13  |
| LmjF.33.1080 | YEATS family, putative                                                     | 0.14  | 8.08E-02 VQAGEVRGAPSPSPSR +3 Methyl x 1                  | Label:13C(1)2H(3)           |
| LmjF.33.1150 | pumilio protein 6, putative (PUF6)                                         | -0.58 | 6.84E-01 FARGGGIGNPNSGR +2 Methyl x 1                    | #N/A                        |
| LmjF.33.1150 | pumilio protein 6, putative (PUF6)                                         | 0.07  | 8.55E-01 GRRGAGGMSMESGSPNSHR +4 Methyl x 1               | R3 Methyl:2H(3)13C(1)       |
| LmjF.33.1150 | pumilio protein 6, putative (PUF6)                                         | -0.59 | 8.71E-01 FARGGGIGNPNSGR +3 Methyl x 1                    | R3 Methyl                   |
| LmjF.33.1150 | pumilio protein 6, putative (PUF6)                                         | -0.25 | 8.77E-01 GRRGAGGMSMESGSPNSHR +3 Methyl x 1               | R3 Methyl:2H(3)13C(1)       |
| LmjF.33.1150 | pumilio protein 6, putative (PUF6)                                         | -0.29 | 9.75E-01 RYNNNSAGGVGGGRVGR +3 Methyl x 1                 | R3 Methyl                   |
| LmjF.33.1150 | pumilio protein 6, putative (PUF6)                                         | 0.29  | 1.00E+00 NNVRGGAGGMSMESGSPNSHR +4 Methyl x 2             | R16 Methyl                  |
|              |                                                                            |       |                                                          | R4 Methyl, R7 Methyl        |

|              |                                                                                                   |       |          |                                                  |                                             |
|--------------|---------------------------------------------------------------------------------------------------|-------|----------|--------------------------------------------------|---------------------------------------------|
| Lmjf.33.1220 | hypothetical protein, conserved                                                                   | -1.34 | 8.07E-01 | EVVTTDNPDWASPLIARGGR +3 Methyl x 1               | R20 Methyl                                  |
| Lmjf.33.2130 | hypothetical protein, conserved                                                                   | 0.76  | 1.00E+00 | ESSGSGTRHGGGAGGGAASGGGHR +3 Methyl x 1           | R8 Methyl:2H(3)13C(1)                       |
| Lmjf.33.2130 | hypothetical protein, conserved                                                                   | -0.07 | 1.04E+00 | ESSGSGTRHGGGAGGGAASGGGHR +4 Methyl x 1           | R8 Methyl:2H(3)13C(1)                       |
| Lmjf.33.2210 | hypothetical protein, conserved                                                                   | -1.36 | 1.04E+00 | HLRGGAAAAR +3 Methyl x 1                         | R3 Methyl:2H(3)13C(1)                       |
| Lmjf.33.2360 | ATP synthase regulation protein NCA2, putative                                                    | 0.00  | 1.00E+00 | GGVVGWCDFNANQSMFWSPIAAGVGRGR +3 Methyl x 1       | R29 Methyl                                  |
| Lmjf.33.2450 | hypothetical protein, conserved                                                                   | -0.51 | 8.50E-01 | AGSVALGGGPNHAPPARGGGGGSGGR +3 Methyl x 1         | R29 Methyl                                  |
| Lmjf.33.2640 | hypothetical protein, conserved                                                                   | -0.44 | 6.45E-01 | QAVSCACRAGYEHVWR +4 Methyl x 1                   | R10 Methyl                                  |
| Lmjf.34.1110 | Shwachman-Bodian-Diamond syndrome (SBDS) protein/SBDS protein C-terminal domain cont              | 0.82  | 1.00E+00 | LGDPSPHLDQDDSDDDGRRGRSR +4 Methyl x 1 Phos x 1   | S13 Phospho, R21 Methyl                     |
| Lmjf.34.1260 | mitochondrial DNA polymerase I protein A, putative                                                | 0.33  | 8.34E-01 | KRGGDAILPGLGALVSCATPAPR +4 Methyl x 1            | R2 Methyl                                   |
| Lmjf.34.1470 | EAP30/Vps36 family, putative                                                                      | -1.95 | 8.58E-01 | VTTAGARGGSPAK +2 Methyl x 1                      | R7 Methyl:2H(3)13C(1)                       |
| Lmjf.34.2430 | DNAJ-like protein                                                                                 | -0.38 | 4.75E-01 | AGGFNSSTYSGGNANDYYRGR +3 Methyl x 1              | R20 Methyl                                  |
| Lmjf.34.2473 | hypothetical protein, conserved                                                                   | -0.15 | 1.80E-01 | QSVAGRGGGGGGYGFY +2 Methyl x 1                   | R6 Methyl:2H(3)13C(1)                       |
| Lmjf.34.3815 | ribosomal protein L14, putative                                                                   | 0.13  | 1.01E+00 | FKRGGGGGEVSR +3 Methyl x 1                       | R4 Methyl:2H(3)13C(1)                       |
| Lmjf.34.4290 | nucleolar protein family a, putative                                                              | 2.10  | 7.26E-01 | GGRGGGGFGGR +2 Methyl x 1                        | R3 Methyl                                   |
| Lmjf.34.4290 | nucleolar protein family a, putative                                                              | -5.12 | 8.20E-01 | GGRGGGGFGGR +3 Methyl x 1                        | R3 Methyl                                   |
| Lmjf.34.4290 | nucleolar protein family a, putative                                                              | -0.65 | 1.00E+00 | GGRRGGHMEPPPEVEVTFMNAEGLVYK +3 Methyl x          | R4 Methyl                                   |
| Lmjf.34.4290 | nucleolar protein family a, putative                                                              | -4.18 | 1.00E+00 | GGRRGGHMEPPPEVEVTFMNAEGLVYK +4 Methyl x          | R4 Methyl                                   |
| Lmjf.35.0610 | hypothetical protein, conserved                                                                   | 0.00  | 1.00E+00 | ANGPAPSGRSGK +2 Methyl x 1                       | R10 Methyl:2H(3)13C(1)                      |
| Lmjf.35.0630 | Nucleoporin NUP65, putative                                                                       | -0.90 | 8.30E-01 | RGGLLESPQANVPDSADATESILR +3 Methyl x 1           | R1 Methyl:2H(3)13C(1)                       |
| Lmjf.35.0630 | Nucleoporin NUP65, putative                                                                       | -0.00 | 1.00E+00 | RRGGLLESPQANVPDSADATESILR +4 Methyl x 1          | #N/A                                        |
| Lmjf.35.0740 | hypothetical protein, conserved                                                                   | 0.01  | 9.26E-01 | ARGGGASGTSGLGTAK +2 Methyl x 1                   | R2 Methyl:2H(3)13C(1)                       |
| Lmjf.35.0740 | hypothetical protein, conserved                                                                   | 0.43  | 1.07E+00 | ARGGGASGTSGLGTAK +3 Methyl x 1                   | R2 Methyl:2H(3)13C(1)                       |
| Lmjf.35.1510 | NLI interacting factor-like phosphatase/Zinc finger C-x8-C-x5-C-x3-H type (and similar), putative | 0.26  | 7.31E-02 | RANNSNDHQHRRGGAR +3 Methyl x 1                   | #N/A                                        |
| Lmjf.35.1510 | NLI interacting factor-like phosphatase/Zinc finger C-x8-C-x5-C-x3-H type (and similar), putative | -2.24 | 4.74E-01 | RANNSNDHQHRRGGAR +4 Methyl x 1                   | #N/A                                        |
| Lmjf.35.1620 | Concanavalin A-like lectin/glucanases superfamily, putative                                       | 0.37  | 8.46E-01 | NNGSSNRNQHVASSITIGASSAAR +3 Methyl x 2 Phos x 1  | #N/A                                        |
| Lmjf.35.2090 | kinesin, putative                                                                                 | 0.44  | 5.68E-02 | RRGGPSAAQAQLEWEMPFQGTVFR +3 Methyl x 1           | R1 Methyl                                   |
| Lmjf.35.2200 | RNA-binding protein, putative                                                                     | 2.45  | 8.29E-01 | HNMGASAYGR +2 Methyl x 1                         | M3 Oxidation, R10 Methyl, M24 Oxidation     |
| Lmjf.35.2200 | RNA-binding protein, putative                                                                     | 10.97 | 1.00E+00 | HNMGASAYGRGAPYQVGAESTEMNGTEPLPKPR +4 Methyl x    | M3 Oxidation, R10 Methyl, M24 Oxidation     |
| Lmjf.35.2200 | RNA-binding protein, putative                                                                     | 0.00  | 1.00E+00 | HNMGASAYGRGAPYQVGAESTEMNGTEPLPKPR +3 Methyl x    | M3 Oxidation, R10 Methyl, M24 Oxidation     |
| Lmjf.35.3100 | ATP-dependent RNA helicase, putative (DED1)                                                       | 0.03  | 8.06E-02 | SGGPGRRGGGGGGGSDRSPASGGGR +4 Methyl x 1          | R7 Methyl                                   |
| Lmjf.35.3100 | ATP-dependent RNA helicase, putative (DED1)                                                       | 0.14  | 6.16E-01 | SGGPGRRGGGGGGGSDRSPASGGGR +3 Methyl x 1          | R7 Methyl                                   |
| Lmjf.35.3100 | ATP-dependent RNA helicase, putative (DED1)                                                       | 0.22  | 8.48E-01 | RRGGGGGGGGHHR +3 Methyl x 3                      | #N/A                                        |
| Lmjf.35.3100 | ATP-dependent RNA helicase, putative (DED1)                                                       | 0.00  | 1.00E+00 | RYDDDEDYEGGDRAGGTGNETDDYEDGGYDAYR +4 Methyl      | R1 Methyl                                   |
| Lmjf.35.3100 | ATP-dependent RNA helicase, putative (DED1)                                                       | -0.36 | 1.03E+00 | RRGGVDDGGF +2 Methyl x 1                         | R1 Methyl:2H(3)13C(1)                       |
| Lmjf.35.3310 | Leucine Rich repeats (2 copies), putative                                                         | -1.13 | 1.00E+00 | KATSSVSGFGGNNVNRGGSGASGNPTIHK +4 Methyl x 1      | R17 Methyl:2H(3)13C(1)                      |
| Lmjf.35.3310 | Leucine Rich repeats (2 copies), putative                                                         | -0.97 | 8.21E-01 | ATSSVSGFGGNNVNRGGSGASGNPTIHK +3 Methyl x 1       | R17 Methyl:2H(3)13C(1)                      |
| Lmjf.35.3310 | Leucine Rich repeats (2 copies), putative                                                         | 0.63  | 2.82E-01 | ATSSVSGFGGNNVNRGGSGASGNPTIHK +4 Methyl x 1       | R17 Methyl:2H(3)13C(1)                      |
| Lmjf.35.3310 | Leucine Rich repeats (2 copies), putative                                                         | -0.13 | 2.14E-01 | KATSSVSGFGGNNVNRGGSGASGNPTIHK +4 Methyl x 1 Phos | #N/A                                        |
| Lmjf.35.3980 | 4E-interacting protein, putative                                                                  | 0.48  | 2.09E-01 | RRGGGGGGGRDSSNSNSVR +4 Methyl x 1                | R1 Methyl, S15 Phospho                      |
| Lmjf.35.3980 | 4E-interacting protein, putative                                                                  | 1.47  | 2.15E-01 | GGHNSMGNGSSNSNSVRSSSTPYVSGGGRRGDNR +4 Meth       | M7 Oxidation, R13 Methyl                    |
| Lmjf.35.3980 | 4E-interacting protein, putative                                                                  | -0.23 | 8.05E-01 | RRGGGGGGGRDSSNSNSVR +3 Methyl x 1                | R1 Methyl, S15 Phospho                      |
| Lmjf.35.3980 | 4E-interacting protein, putative                                                                  | -0.11 | 8.42E-01 | QGRGVGTGNGMSTVPPSPQFQPPPPR +3 Methyl x 1         | R3 Methyl                                   |
| Lmjf.35.3980 | 4E-interacting protein, putative                                                                  | 10.97 | 1.00E+00 | GGHNSMGNGSSNSNSVRSSSTPYVSGGGRRGDNR +5 Met        | Methyl:2H(3)13C(1), R37                     |
| Lmjf.35.4125 | hypothetical protein, conserved                                                                   | -0.26 | 3.75E-01 | SARGGASNGHSPASACTATR +3 Methyl x 1               | R4 Methyl                                   |
| Lmjf.35.4140 | hypothetical protein, unknown function                                                            | 2.02  | 1.00E+00 | ERGGFSAR +2 Methyl x 1                           | R2 Methyl:2H(3)13C(1)                       |
| Lmjf.35.4380 | hypothetical protein, conserved                                                                   | 0.00  | 1.00E+00 | GGRGGAPQGLSTPLNTR +3 Methyl x 1                  | #N/A                                        |
| Lmjf.35.4950 | zinc finger protein family member, putative                                                       | -0.42 | 3.85E-01 | SPPATSASTSPAPPRLGLGR +3 Methyl x 1               | R22 Methyl:2H(3)13C(1)                      |
| Lmjf.35.4950 | zinc finger protein family member, putative                                                       | 0.27  | 4.72E-01 | LSSMERGGMTGVPQHLLPR +4 Methyl x 1                | R6 Methyl                                   |
| Lmjf.35.4950 | zinc finger protein family member, putative                                                       | 0.65  | 8.14E-01 | GAQQHHGVRGVEGNGSSR +3 Methyl x 1                 | #N/A                                        |
| Lmjf.35.4950 | zinc finger protein family member, putative                                                       | -4.78 | 8.52E-01 | SPPATSASTSPAPPRL +2 Methyl x 1                   | R18 Methyl:2H(3)13C(1)                      |
| Lmjf.35.4950 | zinc finger protein family member, putative                                                       | -1.07 | 8.56E-01 | LSSMERGGMTGVPQHLLPR +4 Methyl x 2                | R6 Methyl                                   |
| Lmjf.35.4950 | zinc finger protein family member, putative                                                       | 0.70  | 1.00E+00 | GTEGVGNSYRGAQHHGYR +4 Methyl x 1                 | #N/A                                        |
| Lmjf.35.4950 | zinc finger protein family member, putative                                                       | -0.65 | 1.00E+00 | GATVTVGGHDSVVRGGAAPMSMGAGAASR +4 Methyl x 1      | R17 Methyl                                  |
| Lmjf.35.4950 | zinc finger protein family member, putative                                                       | -0.25 | 1.03E+00 | LSSMERGGMTGVPQHLLPRASPPASQR +4 Methyl x 1 Phos   | #N/A                                        |
| Lmjf.35.4950 | zinc finger protein family member, putative                                                       | -0.05 | 1.03E+00 | LSSMERGGMTGVPQHLLPR +3 Methyl x 1                | R6 Methyl                                   |
| Lmjf.35.5040 | polyadenylate-binding protein 1 (PABP1)                                                           | 10.97 | 1.00E+00 | QLLGGRAQGHMPMPSPQQAQAQPAQGFATPSAVFVQATP          | R6 Methyl                                   |
| Lmjf.36.0450 | hypothetical protein, conserved                                                                   | 0.53  | 9.34E-01 | SFTSAGIGEGGAGRRGAR +3 Methyl x 1                 | R16 Methyl                                  |
| Lmjf.36.0490 | zinc-finger of a C2HC-type, putative                                                              | -0.41 | 4.17E-01 | GPARGGLGATPSYGGDAGMSAR +3 Methyl x 1             | R4 Methyl:2H(3)13C(1), M21                  |
| Lmjf.36.0490 | zinc-finger of a C2HC-type, putative                                                              | -0.56 | 6.04E-01 | GPARGGLGATPSYGGDAGMSAR +3 Methyl x 1 Phos x 1    | Label:13C(1)2H(3)-Oxidation                 |
| Lmjf.36.0490 | zinc-finger of a C2HC-type, putative                                                              | -0.56 | 8.08E-01 | FSSRGGGGMMGGGGGGGR +3 Methyl x 1                 | R4 Methyl:2H(3)13C(1), M21                  |
| Lmjf.36.1240 | hypothetical protein, conserved                                                                   | -1.38 | 1.07E+00 | VSPVPTPLPRGR +3 Methyl x 1                       | Label:13C(1)2H(3)-Oxidation                 |
| Lmjf.36.1640 | universal minicircle sequence binding protein, putative                                           | 0.73  | 1.22E-01 | CGQEGHLSRDCPSQGSRRGGYQK +3 Methyl x 1            | R19 Methyl                                  |
| Lmjf.36.1640 | universal minicircle sequence binding protein, putative                                           | -0.15 | 8.55E-01 | DCPSQGSRRGGYQK +4 Methyl x 1                     | R10 Methyl:2H(3)13C(1)                      |
| Lmjf.36.1640 | universal minicircle sequence binding protein, putative                                           | -0.25 | 8.81E-01 | DCPSQGSRRGGYQK +3 Methyl x 1                     | R10 Methyl:2H(3)13C(1)                      |
| Lmjf.36.1640 | universal minicircle sequence binding protein, putative                                           | -0.28 | 9.26E-01 | DCPSQGSRRGGYQK +2 Methyl x 1                     | R10 Methyl:2H(3)13C(1)                      |
| Lmjf.36.1640 | universal minicircle sequence binding protein, putative                                           | -0.26 | 1.01E+00 | DCPSQGSRRGGYQK +3 Methyl x 1                     | R10 Methyl:2H(3)13C(1)                      |
| Lmjf.36.1925 | 60S ribosomal protein L37a                                                                        | -0.19 | 1.08E+00 | TVAGGAYLSTPNNTVTR +2 Methyl x 1                  | #N/A                                        |
| Lmjf.36.2130 | ATP-dependent RNA helicase DBP2A, putative                                                        | -0.68 | 2.91E-01 | NYSFSGFSTSRGGGGGAHR +3 Methyl x 1                | R13 Methyl:2H(3)13C(1)                      |
| Lmjf.36.2130 | ATP-dependent RNA helicase DBP2A, putative                                                        | 0.58  | 8.50E-01 | NYSFSGFSTSR +2 Methyl x 1                        | #N/A                                        |
| Lmjf.36.2130 | ATP-dependent RNA helicase DBP2A, putative                                                        | -0.02 | 1.06E+00 | NYSFSGFSTSRGGGGGAHR +4 Methyl x 1                | R13 Methyl:2H(3)13C(1)                      |
| Lmjf.36.2580 | related to multifunctional cyclin-dependent kinase pho85-like protein                             | 0.67  | 8.90E-01 | VMRGSSSSQNDMCGSSAR +3 Methyl x 1                 | R3 Methyl                                   |
| Lmjf.36.2670 | hypothetical protein, conserved                                                                   | -2.47 | 1.04E+00 | IATRRGGGQPEGVVR +3 Methyl x 1                    | R4 Methyl                                   |
| Lmjf.36.3200 | DNA topoisomerase III, putative                                                                   | 0.00  | 1.00E+00 | GRRGGDAAAATPSGGVDPVCGCGTPAK +3 Methyl x 1        | #N/A                                        |
| Lmjf.36.3280 | Enoyl-CoA hydratase/isomerase family/2-enoyl-CoA Hydratase C-terminal region, putative            | 0.19  | 1.00E+00 | WFIQGHNPNSGLLR +3 Methyl x 1                     | #N/A                                        |
| Lmjf.36.3280 | Enoyl-CoA hydratase/isomerase family/2-enoyl-CoA Hydratase C-terminal region, putative            | 0.27  | 1.00E+00 | WFIQGHNPNSGLLR +4 Methyl x 1                     | #N/A                                        |
| Lmjf.36.4330 | predicted C2 domain protein                                                                       | 10.97 | 1.00E+00 | YECDHVGTTEAPPAGRRGSHGR +3 Methyl x 1             | #N/A                                        |
| Lmjf.36.4590 | PHD-like zinc-binding domain containing protein, putative                                         | -0.91 | 1.05E+00 | NSGGGTDSDALSSPTARGGAVGGGHR +4 Methyl x 1         | R31 Methyl:2H(3)13C(1)                      |
| Lmjf.36.5100 | hypothetical protein, conserved (PUF11)                                                           | -0.86 | 2.61E-01 | GGYPTPPQQQLQQQYASRGGYGGGAYGAGIQQYYPG             | R21 Methyl                                  |
| Lmjf.36.5100 | hypothetical protein, conserved (PUF11)                                                           | -0.85 | 4.72E-01 | GYPPODGMQYPPQAGR +2 Methyl x 1                   | M8 Label:13C(1)2H(3), R17                   |
| Lmjf.36.5100 | hypothetical protein, conserved (PUF11)                                                           | -0.26 | 5.02E-01 | GYSAQYNSYAAR +2 Methyl x 1                       | Label:13C(1)2H(3)13C(1)                     |
| Lmjf.36.5100 | hypothetical protein, conserved (PUF11)                                                           | -0.83 | 8.03E-01 | GYSAQYNSYAARGYPTPPQQQLQQQYASR +4 Methyl x        | R13 Methyl                                  |
| Lmjf.36.5100 | hypothetical protein, conserved (PUF11)                                                           | 0.46  | 8.50E-01 | GYSAQYNSYAARGYPTPPQQQLQQQYASR +3 Methyl x        | R13 Methyl:2H(3)13C(1)                      |
| Lmjf.36.5100 | hypothetical protein, conserved (PUF11)                                                           | -0.39 | 1.00E+00 | GGYPTPPQQQLQQQYASRGGYGGGAYGAGIQQYYPG             | R21 Methyl                                  |
| Lmjf.36.5100 | hypothetical protein, conserved (PUF11)                                                           | -1.32 | 1.02E+00 | GGYGPYGPYVQQQQGYNQYQNPNTYPAAR +3 Meth            | R36 Methyl:2H(3)13C(1)                      |
| Lmjf.36.5850 | flagellum targeting protein kharon1, putative                                                     | -3.12 | 1.00E+00 | TRGSGVNGATAPFR +2 Methyl x 2 Phos x 1            | R2 Methyl                                   |
| Lmjf.36.5850 | flagellum targeting protein kharon1, putative                                                     | -2.21 | 8.03E-01 | TRGSGVNGATAPFR +3 Methyl x 2                     | R2 Methyl                                   |
| Lmjf.36.5850 | flagellum targeting protein kharon1, putative                                                     | -1.72 | 8.15E-01 | TRGSGVNGATAPFR +2 Methyl x 1                     | R2 Methyl                                   |
| Lmjf.36.5850 | flagellum targeting protein kharon1, putative                                                     | -0.84 | 8.47E-01 | TRGSGVNGATAPFR +2 Methyl x 1 Phos x 1            | R2 Methyl                                   |
| Lmjf.36.5850 | flagellum targeting protein kharon1, putative                                                     | -0.72 | 8.61E-01 | TRGSGVNGATAPFR +3 Methyl x 1 Phos x 1            | R2 Methyl                                   |
| Lmjf.36.5850 | flagellum targeting protein kharon1, putative                                                     | -0.43 | 2.80E-01 | TRGSGVNGATAPFR +3 Methyl x 1                     | R2 Methyl                                   |
| Lmjf.36.5850 | flagellum targeting protein kharon1, putative                                                     | -0.35 | 5.67E-01 | ASHLNLMYASGDYAVASRGGASR +4 Methyl x 1            | R20 Methyl                                  |
| Lmjf.36.6030 | hypothetical protein, conserved                                                                   | -3.27 | 8.49E-01 | FRGMR +2 Methyl x 1                              | #N/A                                        |
| Lmjf.36.6060 | eukaryotic translation initiation factor 4 gamma 4                                                | -0.09 | 1.18E-01 | GPIHSSNAGNRRGTRPPSMADR +4 Methyl x 1             | #N/A                                        |
| Lmjf.36.6060 | eukaryotic translation initiation factor 4 gamma 4                                                | 0.23  | 1.09E+00 | YRGGGPGGLR +2 Methyl x 1                         | R3 Methyl:2H(3)13C(1)                       |
| Lmjf.36.6525 | hypothetical protein, conserved                                                                   | 0.13  | 1.00E+00 | SRGGAFVSVFASHDR +4 Methyl x 1                    | R2 Methyl                                   |
| Lmjf.36.6980 | eukaryotic translation initiation factor 3 subunit c                                              | -2.11 | 4.70E-01 | GRGGMAGRRGAGVR +3 Methyl x 2                     | R2 Methyl, R9 Methyl                        |
| Lmjf.36.6980 | eukaryotic translation initiation factor 3 subunit c                                              | 10.97 | 1.00E+00 | GRGGMAGRR +2 Methyl x 2                          | R2 Methyl:2H(3)13C(1), M5 Label:13C(1)2H(3) |

\*some peptides have the same sequence but different charges or additional post-translational modifications (e.g. Phosphorylation)

Localization score of PTMs was not possible to calculate for some peptides identified by the Proteome Discoverer software

red values: hypomethylated in  $\Delta$ prmt7,  $\log_2(WT/\Delta T) > 0.6$ ; q-value < 0.05

blue values: hypermethylated in  $\Delta$ prmt7,  $\log_2(WT/\Delta T) < -0.6$ ; q-value < 0.05



|             |                                                                                                   |       |          |                                                              |
|-------------|---------------------------------------------------------------------------------------------------|-------|----------|--------------------------------------------------------------|
| LmjF33.0280 | RGG-containing protein 2, putative (RGG2)                                                         | 0.21  | 9.74E-01 | RGRGGGGVWGPAAADEAWNAAPSFQPPVR +4 Methyl x 1                  |
| LmjF33.0280 | RGG-containing protein 2, putative (RGG2)                                                         | -2.14 | 1.00E+00 | GRGGGGVWGPAAADEAWNAAPSFQPPVR +3 Methyl x 1                   |
| LmjF33.1150 | pumilio protein 6, putative (PUF6)                                                                | -0.58 | 6.84E-01 | NNVRRGGGAGGMSGSGPNSHR +4 Methyl x 2                          |
| LmjF33.1150 | pumilio protein 6, putative (PUF6)                                                                | 0.07  | 8.65E-01 | GRRGAGGMSGSGPNSHR +4 Methyl x 1                              |
| LmjF33.1150 | pumilio protein 6, putative (PUF6)                                                                | -0.59 | 8.71E-01 | GRRGAGGMSGSGPNSHR +3 Methyl x 1                              |
| LmjF33.1150 | pumilio protein 6, putative (PUF6)                                                                | -0.25 | 8.77E-01 | RNNNSAGGVGGGRGR +3 Methyl x 1                                |
| LmjF33.1150 | pumilio protein 6, putative (PUF6)                                                                | -0.29 | 9.75E-01 | FARRGGGINNSGR +2 Methyl x 1                                  |
| LmjF33.1150 | pumilio protein 6, putative (PUF6)                                                                | 0.29  | 1.00E+00 | FARRGGGINNSGR +3 Methyl x 1                                  |
| LmjF34.1110 | Shwachman-Bodian-Diamond syndrome (SBDS) protein/SBDS protein C-terminal domain contai            | 0.82  | 1.00E+00 | LGLDPSHLDDDDDDGGGRGRGR +4 Methyl x 1 Phos x 1                |
| LmjF34.3515 | ribosomal protein L14, putative                                                                   | 0.31  | 1.01E+00 | FKGRGGGGVSR +3 Methyl x 1                                    |
| LmjF34.4290 | nucleolar protein family a, putative                                                              | 2.10  | 7.26E-01 | GRRGGGGVGGGR +2 Methyl x 1                                   |
| LmjF34.4290 | nucleolar protein family a, putative                                                              | -5.12 | 8.20E-01 | GGRGGHMSPEPPENVEVGTFMNAEGLVYK +3 Methyl x 1                  |
| LmjF34.4290 | nucleolar protein family a, putative                                                              | -0.65 | 1.00E+00 | GGRGGHMSPEPPENVEVGTFMNAEGLVYK +4 Methyl x 1                  |
| LmjF34.4290 | nucleolar protein family a, putative                                                              | -4.18 | 1.00E+00 | GRRGGGGVGGGR +3 Methyl x 1                                   |
| LmjF35.0630 | Nucleoporin NUP65, putative                                                                       | -0.90 | 8.30E-01 | RRGLLESQANVPSADATESILR +4 Methyl x 1                         |
| LmjF35.0630 | Nucleoporin NUP65, putative                                                                       | 0.00  | 1.00E+00 | RRGLLESQANVPSADATESILR +3 Methyl x 1                         |
| LmjF35.1510 | NLI interacting factor-like phosphatase/Zinc finger C-x8-C-x5-C-x3-H type (and similar), putative | 0.26  | 7.31E-02 | RANNSNDHQRGGGR +4 Methyl x 1                                 |
| LmjF35.1510 | NLI interacting factor-like phosphatase/Zinc finger C-x8-C-x5-C-x3-H type (and similar), putative | 2.24  | 4.74E-01 | RANNSNDHQRGGGR +3 Methyl x 1                                 |
| LmjF35.2200 | RNA-binding protein, putative (DRB2)                                                              | 2.45  | 8.29E-01 | HNMAAGYRGAPYVGAESTEMNGTEPLPKPR +4 Methyl x 1                 |
| LmjF35.2200 | RNA-binding protein, putative (DRB2)                                                              | 10.97 | 1.00E+00 | HNMAAGYRGAPYVGAESTEMNGTEPLPKPR +3 Methyl x 1                 |
| LmjF35.2200 | RNA-binding protein, putative (DRB2)                                                              | 0.00  | 1.00E+00 | HNMAAGYRGAPYVGAESTEMNGTEPLPKPR +3 Methyl x 1 Phos x 1        |
| LmjF35.3100 | ATP-dependent RNA helicase, putative (DED1)                                                       | 0.03  | 8.08E-02 | RRGGGGGGGGGR +3 Methyl x 3                                   |
| LmjF35.3100 | ATP-dependent RNA helicase, putative (DED1)                                                       | 0.14  | 6.18E-01 | SGPGGRGGGGGGGSDRSPAPSGGR +3 Methyl x 1                       |
| LmjF35.3100 | ATP-dependent RNA helicase, putative (DED1)                                                       | 0.22  | 8.48E-01 | SGPGGRGGGGGGGSDRSPAPSGGR +4 Methyl x 1                       |
| LmjF35.3100 | ATP-dependent RNA helicase, putative (DED1)                                                       | 0.00  | 1.00E+00 | RYVDEDDYEGGDRAGTGNEDDDYEDGGYDAYR +4 Methyl x 1               |
| LmjF35.3100 | ATP-dependent RNA helicase, putative (DED1)                                                       | -0.36 | 1.03E+00 | RRGGVDDGGF +2 Methyl x 1                                     |
| LmjF35.3980 | 4E-interacting protein, putative                                                                  | 0.48  | 2.09E-01 | GGHNSGNGGSSNHPGSSTPVYSGGGRRGDNR +5 Methyl x 1                |
| LmjF35.3980 | 4E-interacting protein, putative                                                                  | 1.47  | 2.15E-01 | GGHNSGNGGSSNHPGSSTPVYSGGGRRGDNR +4 Methyl x 1                |
| LmjF35.3980 | 4E-interacting protein, putative                                                                  | -0.23 | 8.05E-01 | RRGGGGGNGRRDSSNSVR +4 Methyl x 1                             |
| LmjF35.3980 | 4E-interacting protein, putative                                                                  | -0.11 | 8.42E-01 | GGRVGTGNGMSTVPPSPQFQPPPPR +3 Methyl x 1                      |
| LmjF35.3980 | 4E-interacting protein, putative                                                                  | 10.97 | 1.00E+00 | RRGGGGGNGRRDSSNSVR +3 Methyl x 1                             |
| LmjF35.4950 | zinc finger protein family member, putative                                                       | -0.42 | 3.85E-01 | GTEGVNSYRGAQGHYGR +4 Methyl x 1                              |
| LmjF35.4950 | zinc finger protein family member, putative                                                       | 0.27  | 4.72E-01 | GAQQHHYRGVGGSSR +3 Methyl x 1                                |
| LmjF35.4950 | zinc finger protein family member, putative                                                       | 0.65  | 8.14E-01 | LSSMERGMTVGPQHLLPPR +4 Methyl x 1                            |
| LmjF35.4950 | zinc finger protein family member, putative                                                       | -4.78 | 8.52E-01 | LSSMERGMTVGPQHLLPPR +3 Methyl x 1                            |
| LmjF35.4950 | zinc finger protein family member, putative                                                       | -1.07 | 8.56E-01 | LSSMERGMTVGPQHLLPPR +4 Methyl x 1 Phos x 1                   |
| LmjF35.4950 | zinc finger protein family member, putative                                                       | 0.70  | 1.00E+00 | SPPATSASTSAPPALRLGR +3 Methyl x 1                            |
| LmjF35.4950 | zinc finger protein family member, putative                                                       | -0.65 | 1.00E+00 | GATVTVGVIDSSVGRGGAAPMSGMGAASR +4 Methyl x 1                  |
| LmjF35.4950 | zinc finger protein family member, putative                                                       | -0.25 | 1.03E+00 | LSSMERGMTVGPQHLLPPR +4 Methyl x 2                            |
| LmjF35.4950 | zinc finger protein family member, putative                                                       | -0.05 | 1.03E+00 | SPPATSASTSAPPALRL +2 Methyl x 1                              |
| LmjF35.5040 | polyadenylate-binding protein 1 (PABP1)                                                           | 10.97 | 1.00E+00 | QLLGRAGHPMPSPQOPQAPQGFATPSAVGFVQATPK +4 Methyl x 1           |
| LmjF36.0490 | zinc-finger of a C2HC-type, putative                                                              | -0.41 | 4.17E-01 | GPARGGLFATPSGYGDGAGMSAR +3 Methyl x 1                        |
| LmjF36.0490 | zinc-finger of a C2HC-type, putative                                                              | -0.56 | 6.04E-01 | GPARGGLFATPSGYGDGAGMSAR +3 Methyl x 1 Phos x 1               |
| LmjF36.0490 | zinc-finger of a C2HC-type, putative                                                              | -0.56 | 8.08E-01 | FSSRGGGGGGGGGGGR +3 Methyl x 1                               |
| LmjF36.1640 | universal minicircle sequence binding protein, putative                                           | 0.73  | 1.22E-01 | CGQEGHLSRDCSSQGGRRGQK +3 Methyl x 1                          |
| LmjF36.1640 | universal minicircle sequence binding protein, putative                                           | -0.15 | 8.55E-01 | DCPSSQGGRRGQK +4 Methyl x 1                                  |
| LmjF36.1640 | universal minicircle sequence binding protein, putative                                           | -0.25 | 8.51E-01 | DCPSSQGGRRGQK +3 Methyl x 1                                  |
| LmjF36.1640 | universal minicircle sequence binding protein, putative                                           | -0.28 | 9.26E-01 | DCPSSQGGRRGQK +3 Methyl x 1                                  |
| LmjF36.1640 | universal minicircle sequence binding protein, putative                                           | -0.26 | 1.01E+00 | DCPSSQGGRRGQK +2 Methyl x 1                                  |
| LmjF36.1925 | 60S ribosomal protein L37a                                                                        | -0.19 | 1.08E+00 | TVAGGYLSTFNNSTR +2 Methyl x 1                                |
| LmjF36.2130 | ATP-dependent RNA helicase DBP2A, putative                                                        | -0.88 | 2.81E-01 | NYSFSGSTTSRGGGSAHR +4 Methyl x 1                             |
| LmjF36.2130 | ATP-dependent RNA helicase DBP2A, putative                                                        | -0.08 | 8.50E-01 | NYSFSGSTTSR +2 Methyl x 1                                    |
| LmjF36.2130 | ATP-dependent RNA helicase DBP2A, putative                                                        | 0.52  | 1.08E+00 | NYSFSGSTTSRGGGSAHR +3 Methyl x 1                             |
| LmjF36.5100 | hypothetical protein, conserved (PUF11)                                                           | -0.86 | 2.61E-01 | GYSDAYNGSYAARGGYQTPPQQQAQLQGGYASR +3 Methyl x 1              |
| LmjF36.5100 | hypothetical protein, conserved (PUF11)                                                           | -0.85 | 4.72E-01 | GYSDAYNGSYAARGGYQTPPQQQAQLQGGYASR +2 Methyl x 1              |
| LmjF36.5100 | hypothetical protein, conserved (PUF11)                                                           | -0.26 | 5.02E-01 | GGYQTPPQQQAQLQGGYASRGGYQGGGAYGGAGIOQGYPGAAPISR +5 Methyl x 1 |
| LmjF36.5100 | hypothetical protein, conserved (PUF11)                                                           | -0.83 | 8.03E-01 | GYSDAYNGSYAARGGYQTPPQQQAQLQGGYASR +4 Methyl x 1              |
| LmjF36.5100 | hypothetical protein, conserved (PUF11)                                                           | 0.46  | 8.50E-01 | GYPPQDGMGYQDAGR +2 Methyl x 1                                |
| LmjF36.5100 | hypothetical protein, conserved (PUF11)                                                           | -0.39 | 1.08E+00 | GGYQTPPQQQAQLQGGYASRGGYQGGGAYGGAGIOQGYPGAAPISR +4 Methyl x 1 |
| LmjF36.5100 | hypothetical protein, conserved (PUF11)                                                           | -1.32 | 1.02E+00 | GGYQTPPQQQAQLQGGYASRGGYQGGGAYGGAGIOQGYPGAAPISR +3 Methyl x 1 |
| LmjF36.6060 | eukaryotic translation initiation factor 4 gamma 4                                                | -0.09 | 1.18E-01 | YRGGGPGCLR +2 Methyl x 1                                     |
| LmjF36.6060 | eukaryotic translation initiation factor 4 gamma 4                                                | 0.23  | 1.09E+00 | GRHSSNAGNRRGSTRPPSMADR +4 Methyl x 1                         |
| LmjF36.6080 | eukaryotic translation initiation factor 3 subunit c                                              | -2.11 | 4.70E-01 | GRGGMAGGR +2 Methyl x 2                                      |
| LmjF36.6080 | eukaryotic translation initiation factor 3 subunit c                                              | 10.97 | 1.00E+00 | GRGGMAGGRGAGVR +3 Methyl x 2                                 |

\*some peptides have the same sequence but different charges or additional post-translational modifications (e.g. Phosphorylation)  
 Socalization score of PTMs was not possible to calculate for some peptides identified by the Proteome Discoverer software

red values: hypomethylated in  $\Delta$ prmt7,  $\log_2(WT/\Delta) > 0.6$ ; q-value < 0.05  
 blue values: hypermethylated in  $\Delta$ prmt7,  $\log_2(WT/\Delta) < -0.6$ ; q-value < 0.05

**Supplemental Table S3.** List of oligonucleotides used in this study for PCR or qRT-PCR.

| Oligo                         | Oligo sequence                                         | Strategy                     |
|-------------------------------|--------------------------------------------------------|------------------------------|
| 914.RT-NIMA-R                 | GCA CAA TCT GGT AGA AGA GA                             | RIP-qRT-PCR                  |
| 913.RT-NIMA-F                 | GAC AAG CTG TTG CTT ATT AT                             | RIP-qRT-PCR                  |
| 910.RT-p1s1-301530-R          | CCA TCG CGT CAA GCT TTT CC                             | RIP-qRT-PCR                  |
| 909.RT-p1s1-301530-F          | TGT GCG TGA CTG AGG TTC TC                             | RIP-qRT-PCR                  |
| 908.RT-GAPDHcyto-R            | TGT CAT GAG GCC CTC GAC TA                             | RIP-qRT-PCR                  |
| 907.RT-GAPDHcyto-F            | ACG GGC AGC CCA TTA TAT CG                             | RIP-qRT-PCR                  |
| 906.RT-amastin340500-R        | ACC TTC TCT CCA TGC TGT GC                             | RIP-qRT-PCR                  |
| 905.RT-amastin340500-F        | TGC CAG AAC AGA GGG CTT TC                             | RIP-qRT-PCR                  |
| B3-18S-2                      | TCC TTG AAG AAT GCC TTC GC                             | RIP-qRT-PCR                  |
| F3-18S-2                      | AAC CTC GGT TCG GTG TGT                                | RIP-qRT-PCR                  |
| Lmex NMT qPCR For             | GCCAAAGACGGTGGCCGATA                                   | RIP-qRT-PCR                  |
| Lmex NMT qPCR Rev             | GGCGTCCACCACTCAAATGT                                   | RIP-qRT-PCR                  |
| 800.5FLR-Alba20-F             | ACA TCC TTC CTG TTC CCC CA                             | Confirm HA-Alba3 integration |
| 787.3FLR-CCCH0740-R           | GCC GGT AGA CCC TCT TCC AT                             | Confirm HA-Torus integration |
| 786.3FLR-Alba20-R             | AAA TAG CCA GCC CCT CCC C                              | Confirm HA-Alba3 integration |
| 784.3FLR-HEL67-R              | ACG TGT TCC CTC CTG CCT TA                             | Confirm HA-DDX3 integration  |
| 783.3FLR-RBP16-R              | GCC CTC TCA CTC GTC CTC TT                             | Confirm HA-RBP16 integration |
| 799.Alba20-HindIII-R          | TGA AAG CTT CTA GTT CTC GCG GTC ATC HA-tagging - Alba3 |                              |
| 798.Alba20-noATG-NheI-BamHI-F | TGA GCT AGC GGA TCC CCT CCA CGT CCC HA-tagging - Alba3 |                              |
| 5'FLR-CCCH0740-SfiIA-F        | TGA GGCCACCTAGGCC GTTCGACGTAGCC HA-tagging - Torus     |                              |
| 5'FLR-CCCH0740-SfiIB-R        | TGA GGCCACGCAGGCC CGTCGTCTTCGTT HA-tagging - Torus     |                              |
| CCCH0740-noATG-SfiIC-F        | TGA GGCCGCTGGGGCC TTCCCCATGGAT HA-tagging - Torus      |                              |
| 821.CCCH0740-SfiID-OK-R       | TGA GGC CTG ACT GGC CCT ACT CGA TCC HA-tagging - Torus |                              |
| 5'FLR-Hel67-SfiIA-F           | TGA GGCCACCTAGGCC GGGGAGGAAAAA HA-tagging - DDX3       |                              |
| 5'FLR-Hel67-SfiIB-R           | TGA GGCCACGCAGGCC GATTCGTGCTTAC HA-tagging - DDX3      |                              |
| Hel67-noATG-SfiIC-F           | TGA GGCCGCTGGGGCC TATAAGAATCAG HA-tagging - DDX3       |                              |
| Hel67-SfiID-R                 | TGA GGCTCAGTGGCC CTA CTGACCAAAC HA-tagging - DDX3      |                              |
| 5'FLR-RBP16-SfiIA-F           | TGA GGCCACCTAGGCC CATTCTCTCGGT HA-tagging - RBP16      |                              |
| 5'FLR-RBP16-SfiIB-R           | TGA GGCCACGCAGGCC GACTGCTTGAAA HA-tagging - RBP16      |                              |
| RBP16-noATG-SfiIC-F           | TGA GGCCGCTGGGGCC TTCCGTGTTTCCT HA-tagging - RBP16     |                              |
| RBP16-SfiID-R                 | TGA GGCTCAGTGGCC CTAGAACTCATCG HA-tagging - RBP16      |                              |
